# Supplementary material for: Effectiveness of the 13-valent pneumococcal conjugate vaccine against adult pneumonia in Italy: a case–control study in a 2-year prospective cohort
Source: PubMed Central journal article supplement — BMJ Open. 2018 Mar 25;8(3):e019034. doi: 10.1136/bmjopen-2017-019034 (PMC5875676; doi:10.1136/bmjopen-2017-019034), 2018-03-25
Supplement: bmjopen-2017-019034.draft_revisions.pdf [file bmjopen-2017-019034.draft_revisions.pdf]

# BMJ Open

BMJ Open is committed to open peer review. As part of this commitment we make the peer review history of every article we publish publicly available.

When an article is published we post the peer reviewers' comments and the authors' responses online. We also post the versions of the paper that were used during peer review. These are the versions that the peer review comments apply to.

The versions of the paper that follow are the versions that were submitted during the peer review process. They are not the versions of record or the final published versions. They should not be cited or distributed as the published version of this manuscript.

BMJ Open is an open access journal and the full, final, typeset and author-corrected version of record of the manuscript is available on our site with no access controls, subscription charges or pay-per-view fees (<http://bmjopen.bmj.com>).

If you have any questions on BMJ Open's open peer review process please email [info.bmjopen@bmj.com](mailto:info.bmjopen@bmj.com)

# BMJ Open

## Effectiveness of the 13-valent pneumococcal conjugate vaccine against adult pneumonia in Italy: a case-control study in a two-year prospective cohort

|                                 |                                                                                                                                                                                                                                                                                                                                                                                                                                                                                                                  |
|---------------------------------|------------------------------------------------------------------------------------------------------------------------------------------------------------------------------------------------------------------------------------------------------------------------------------------------------------------------------------------------------------------------------------------------------------------------------------------------------------------------------------------------------------------|
| Journal:                        | <i>BMJ Open</i>                                                                                                                                                                                                                                                                                                                                                                                                                                                                                                  |
| Manuscript ID                   | bmjopen-2017-019034                                                                                                                                                                                                                                                                                                                                                                                                                                                                                              |
| Article Type:                   | Research                                                                                                                                                                                                                                                                                                                                                                                                                                                                                                         |
| Date Submitted by the Author:   | 07-Aug-2017                                                                                                                                                                                                                                                                                                                                                                                                                                                                                                      |
| Complete List of Authors:       | Prato, Rosa; University of Foggia, Department of Medical and Surgical Sciences<br>Fortunato, Francesca; Università degli Studi di Foggia, Department of Medical and Surgical Sciences<br>Cappelli, Maria; Università degli Studi di Foggia, Department of Medical and Surgical Sciences<br>Chironna, Maria; Università degli Studi di Bari Aldo Moro, Department of Biomedical Science and Human Oncology<br>Martinelli, Domenico; Università degli Studi di Foggia, Department of Medical and Surgical Sciences |
| <b>Primary Subject Heading</b>: | Infectious diseases                                                                                                                                                                                                                                                                                                                                                                                                                                                                                              |
| Secondary Subject Heading:      | Public health, Epidemiology                                                                                                                                                                                                                                                                                                                                                                                                                                                                                      |
| Keywords:                       | PCV13, Pneumococcal conjugate vaccine, Vaccine effectiveness, Adult, Community-acquired pneumonia                                                                                                                                                                                                                                                                                                                                                                                                                |
|                                 |                                                                                                                                                                                                                                                                                                                                                                                                                                                                                                                  |

SCHOLARONE™  
Manuscripts

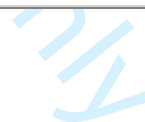

1  
2  
3 Effectiveness of the 13-valent pneumococcal conjugate vaccine  
4  
5  
6  
7 against adult pneumonia in Italy: a case-control study in a two-  
8  
9  
10 year prospective cohort  
11  
12  
13  
14  
15

16 Rosa Prato<sup>1\*</sup>, Francesca Fortunato<sup>1</sup>, Maria Giovanna Cappelli<sup>1</sup>, Maria Chironna<sup>2</sup>, Domenico Martinelli<sup>1</sup>  
17

18 <sup>1</sup> Department of Medical and Surgical Sciences, University of Foggia, Foggia, Italy

19 <sup>2</sup> Department of Biomedical Science and Human Oncology, Aldo Moro University of Bari, Bari, Italy  
20  
21

22 **\*Corresponding Author**

23 Rosa Prato

24 Dipartimento di Scienze Mediche e Chirurgiche, Università degli Studi di Foggia

25 Polo Biomedico "E. Altomare" - Viale L. Pinto, 71122 – Foggia

26 Tel.: +39 (0)881 588036 – Fax. +39 (0)881 588047

27 E-mail: [rosa.prato@unifg.it](mailto:rosa.prato@unifg.it)  
28  
29  
30

31 **Word count: 3,931**  
32  
33  
34  
35  
36  
37  
38  
39  
40  
41  
42  
43  
44  
45  
46  
47  
48  
49  
50  
51  
52  
53  
54  
55  
56  
57  
58  
59  
60

## Abstract

**Objectives** Current strategies to prevent adult pneumococcal disease have been recently reviewed in Italy. We did a post-licensure study to assess the direct effectiveness (VE) of the 13-valent pneumococcal conjugate vaccine (PCV13) against adult pneumococcal community-acquired pneumonia (pCAP).

**Study design** Between 2013-2015, a two-year prospective cohort study of adults with CAP was conducted in the Apulia region of Italy where the average vaccine uptake of PCV13 was 32% among adults  $\geq 65$  years. The test-negative design was used to assess VE against all episodes of confirmed pCAP and vaccine-type (VT) CAP. VE in a subgroup of patients managed in the community was also measured using a matched case-control design. VE was calculated as one minus the OR times 100%.

**Results** The overall VE of PCV13 was 33.3% (95% CI -93.1% to 77.0%) against pCAP irrespective of serotype and 54.2% (95% CI -210.2% to 93.2%) against VT-CAP in the cohort of adults  $\geq 65$  years. The VE was 71.4% (95% CI -379.8% to 98.3%) against VT-CAP in the age groups at higher vaccine uptake. For the subgroup of cases managed in the community, the overall VE against disease due to any pneumococcal strain was 88.1% (95% CI 4.2% to 98.5%) and was 91.7% (95% CI 13.1% to 99.2%) when we controlled for underlying conditions.

**Conclusions** PCV13 appears effective against all confirmed pCAP already with modest levels of uptake in the population of adults  $\geq 65$  years of age. Additional studies are needed to confirm these direct vaccine benefits.

**Keywords** PCV13, Pneumococcal conjugate vaccine, Vaccine effectiveness, Adult, Italy, Community-acquired pneumonia

## Strengths and limitation of this study

- This is the first study to investigate the direct effectiveness of PCV13 for prevention of adult pneumococcal community-acquired pneumonia requiring hospitalization or managed in the community.
- We have been able to estimate PCV13 VE already with modest levels of vaccine uptake in the target population.
- The active surveillance of CAP was performed in a single regional setting leading to a small study size reducing the power to detect statistically significant effects.
- The test-negative method may have overestimated PCV13 VE if, by reducing the risk of acquiring vaccine-type serotypes, vaccination increases the risk of acquiring non vaccine-type serotypes as is likely to be the case if there is serotype replacement.

## INTRODUCTION

Pneumonia is the fourth-leading cause of death globally and *Streptococcus pneumoniae* is by far the most frequent pathogen recovered from patients with community-acquired pneumonia (CAP), accounting for 12 to 85% of all CAP cases.[1-5] Children younger than five years of age, the elderly and people with certain underlying diseases are at an increased risk of developing a more severe course of pneumococcal CAP (pCAP) as well as complications, including death.[2,4]

Routine administration of the 7-valent conjugate vaccine (PCV7) since 2000 and of the second-generation conjugate vaccines (PCV10 and PCV13) since 2010 has resulted in an overall reduction in the rates of pneumococcal disease in both vaccinated and unvaccinated children, and indirectly among adults in several countries, owing to herd immunity.[6-7] However, the most recent available data suggest that significant burden still results from pneumococcal infection in older adults despite the impact of childhood PCV vaccination.

In the United States, the annual incidence of community-acquired pneumonia requiring hospitalization in 2010-2012 was 24.8 cases (95% CI 23.5 to 26.1) per 10,000 adults 18 years of age or older, with a prevalence of pneumococcal disease of 5% and an incidence that was almost 5 times as high among adults 65 years of age or older as among younger adults.[8] In 2013, an estimated 10% of CAP cases in adults aged  $\geq 65$  years were caused by *S. pneumoniae* serotypes potentially preventable with the use of PCV13 in this population.[9] On August 13, 2014, the Advisory Committee on Immunization Practices (ACIP) recommended routine use of PCV13 among adults aged  $\geq 65$  years in series with the currently recommended 23-valent pneumococcal polysaccharide vaccine (PPSV23 - administered at least one year later).[9]

In the UK, incidence of adult pneumococcal pneumonia declined over the 2008-2013 period, with serotypes included in PCV13 declining post-PCV13 introduction, suggesting an early herd protection effect from infant PCV13 on adult bacteraemic and non-bacteraemic disease.[10] Despite this, the most recent available data from 2012-2013 showed an incidence of 20.6 per 100,000 population for hospitalized adult pneumococcal CAP and 8.6 per 100,000 population for PCV13 serotype CAP.[10] PCV13 is not currently part of the UK adult vaccination programme while PPV23 continues to be offered to those aged 65 years and over and the indicated risk groups.[11]

1  
2  
3 In Italy, high infant PCV13 coverage has been achieved since 2011 (vaccine uptake rate 90-95%).[12] For  
4 adults, only PPSV23 was recommended for routine immunization of those aged  $\geq 65$  years and at-risk  
5 individuals, but the vaccine uptake rates have been low to date. In recent years, some Italian regions have  
6 recommended PCV13 to adults with underlying diseases and to the elderly (immunization of one or more  
7 age cohorts  $\geq 65$  years).[13]

8  
9  
10  
11  
12 Impact of PCV infant vaccination on adult pneumococcal pneumonia has not been well established in Italy.  
13  
14 As a matter of fact, the hospitalization rates for pneumococcal pneumonia in the elderly population have  
15 remained relatively stable over the past decade, indicating a lack of herd protection amongst older age  
16 groups.[14] Factors influencing this trend are controversial.[15] However, because the incidence of CAP  
17 remains strongly age dependent,[16] the impact of a continually ageing population in Italy and the higher  
18 immunologic risk in elderly people (the so-called immunosenescence) on CAP incidence in the future  
19 requires close observation and continued efforts to determine the most effective adult pneumococcal  
20 vaccination strategy.[1, 17]

21  
22  
23  
24  
25  
26  
27  
28  
29 In 2014, the results of the Community-Acquired Pneumonia Immunization Trial in Adults (CAPITA)  
30 conducted in The Netherlands demonstrated 45.6% (95% CI 21.8% to 62.5%) efficacy of PCV13 against a  
31 first episode of vaccine-type pneumococcal pneumonia, 45.0% (95% CI 14.2% to 65.3%) efficacy against a  
32 first episode of vaccine-type non-bacteremic and noninvasive pneumococcal pneumonia, and 75.0% (95% CI  
33 41.4% to 90.8%) efficacy against a first episode of vaccine-type invasive disease among adults aged  $\geq 65$   
34 years.[18]

35  
36  
37  
38  
39  
40  
41 Evidence from the CAPITA trial led to the ACIP recommendations,[9, 19-20] of which a review is planned  
42 for 2018 owing to potential changes in the epidemiological situation. In particular, studies evaluating the  
43 post-licensure effectiveness of PCV13 for prevention of invasive and non-bacteremic pneumococcal  
44 pneumonia among adults  $\geq 65$  years old using a case control design are needed.[20] This study addresses this  
45 unmet need.

46  
47  
48  
49  
50  
51 We report findings of the direct impact of PCV13 from a two-year prospective study of a cohort of  
52 pneumococcal CAP adults.  
53  
54  
55  
56  
57  
58  
59  
60

## Methods

From January 2013 until January 2015, a prospective, multicenter, population-based, active surveillance study of adults with CAP was conducted over two years in Apulia, a large Italian region of approximately 4,000,000 inhabitants. PPSV23 was introduced in Apulia in 2000 for use in adults aged  $\geq 65$  years and was replaced by PCV13 in November 2011 for adults aged 65, 70, and  $\geq 75$  years.[21] In 2015, the average vaccine uptake of PCV13 was 32% amongst adults aged 65-75 years (11 cohorts) and 10% in the overall population  $>75$  years.[22]

According to 2013 census figures, the designated surveillance area included about 788,000 adults 65 years of age or older.[23] Patients were enrolled in two different study settings from a network of 31 sentinel physicians. Surveillance for suspected CAP was conducted by 16 treating physicians among patients presenting at 13 hospitals located in the region (a total of 13,841 patients admitted to Departments of Respiratory Medicine in 2013-2014) and by 15 general practitioners (GPs) providing primary care for a total of 5,010 persons aged  $\geq 65$  years throughout the region.

Adults  $\geq 65$  years with symptoms suggestive of lower respiratory tract infection were eligible for enrolment if they presented to a study hospital or to their GP for a clinical assessment; resided in the study region; had at least two of the following clinical criteria: new cough or sputum production, fever  $>38.0^{\circ}\text{C}$  or hypothermia  $<36.1^{\circ}\text{C}$ , chest pain, dyspnea, tachypnea, new altered mental status, abnormal lung examination, respiratory failure, leukocytosis ( $>10 \times 10^9$  white blood cells/liter or  $>15\%$  bands) or leukopenia ( $<4.5 \times 10^9$  white blood cells/liter), C-reactive protein value  $>3$  times the upper limit of normal, hypoxemia with a partial oxygen pressure  $<60$  mm Hg while the patient was breathing room air; and had evidence of new infiltrates on chest radiography consistent with pneumonia.[24] Exclusion criteria were discharge from hospital within the preceding 10 days and residence in a nursing home, long-term care facility, or other institution.

Written informed consent was obtained from all the patients or their caregivers before enrolment. Study sentinel physicians used a standardised electronic Case Report Form to collect information regarding patient demographics, clinical information, microbiological investigations and status regarding receipt of pneumococcal vaccination; pneumonia severity was assessed using the CURB-65 score (Confusion, Urea  $>7$  mmol/L, Respiratory rate  $\geq 30$  breaths/min, low systolic  $<90$  mm Hg or diastolic  $\leq 60$  mm Hg Blood pressure,



1  
2  
3 age  $\geq 65$  years). Patients were contacted 30 days after enrolment for outcome measures collection (30-day  
4 mortality, recovery with *sequelae*).

6  
7 The study protocol was approved by the Institutional Review Board at the Apulian Regional Observatory for  
8 Epidemiology (PROT:18/OER/2012 February 20, 2012). The study was conducted according to the  
9 principles expressed in the Declaration of Helsinki.

11  
12  
13 Blood samples and nasopharyngeal swabs were obtained from the patients who presented to sentinel  
14 centers/GPs with symptoms of lower respiratory tract infection within 24 hours after presentation. In the case  
15 of patients with a productive cough, sputum was obtained. Bronchoalveolar-lavage (BAL) samples, blood-  
16 culture and sputum specimens that had been obtained for clinical care were sent to the Regional Reference  
17 Laboratory for Invasive Bacterial Diseases and analysed for the study.

19  
20  
21  
22  
23  
24 *S. pneumoniae* was isolated by PCR and multiplex sequential PCR. Bacterial genomic DNA was extracted  
25 from 200  $\mu$ l of biological samples using the QIAamp Dneasy Blood and Tissue kit (Qiagen), according to the  
26 manufacturer's instructions. Detection of *S. pneumoniae* was performed using a commercial multiplex assay  
27 (Pneumobacter ACE Detection for blood and Meningitis ACE Detection for CSF, Seegene; Sensitivity:  
28 detection limit of the Seeplex Pneumobacter Ace Detection = 10 copy/reaction – 10 copy/3  $\mu$ l DNA). *S.*  
29  
30  
31  
32  
33  
34  
35  
36  
37  
38  
39  
40  
41  
42  
43  
44  
45  
46  
47  
48  
49  
50  
51  
52  
53  
54  
55  
56  
57  
58  
59  
60  
*pneumoniae* serotyping was performed on PCR positive samples through a sequential multiplex PCR.[25]  
Twenty-nine primer pairs were designed to target serotypes 1, 3, 4, 5, 6 A/B, 7F, 7C, 8, 9V, 10A, 11A, 12F,  
14, 15A, 15 B/C, 16F, 17F, 18, 19A, 19F, 20, 22F, 23F, 31, 33F, 34, 35B, 35F, and 38. A primer pair  
(primers cpsA-f and cpsA-r) was also included as an internal control targeting the cpsA (pneumococcal  
capsular polysaccharide synthesis gene) locus found in all pneumococci.[26] The amplified products, ranging  
from 250 bp to 988 bp, were analyzed by means of electrophoresis on a 2% agarose gel (Life Technologies)  
and visualization under UV light.

Patients with a positive PCR result for *S. pneumoniae* on blood/sputum/BAL were deemed to have  
pneumococcal CAP. Nasopharyngeal swabs samples were not used for the diagnosis of pCAP, due to the  
poor sensitivity and specificity previously reported.[8]

## Vaccine Effectiveness analysis

To estimate the vaccine effectiveness (VE) of PCV13 in the prevention of pneumococcal CAP, a test-negative design was performed on cases enrolled during the study surveillance period. The analysis included two primary end points:

- I. **VE in preventing confirmed pneumococcal CAP irrespective of serotype**, where cases were patients who had an episode of invasive or non-invasive pCAP due to any pneumococcal strain and controls were participants with an episode of non pneumococcal pneumonia;
- II. **VE in preventing confirmed vaccine-type (VT) CAP**, where cases were patients with an episode of invasive or non-invasive pCAP due to vaccine-type strains and controls were patients with non-vaccine-type (NVT) pneumococcal CAP.

These two end points were further assessed among patients who had underlying conditions.

The exposure of interest was vaccination with PCV13. The exposure to PPSV23 given <5 years prior to study enrolment was also assessed. Data were based on verified vaccine information and not self-report.

To further study the effectiveness of PCV13 in the prevention of episodes of confirmed pCAP managed in the community, a subgroup analysis of cases reported by GPs network was performed. This analysis was performed according to a 1:3 matched case-control design. For every enrolled patient, a list of potential asymptomatic controls was generated from GPs subjects' medical records. Three controls, matched by GP, age, and gender, were selected at random for each case. Controls were enrolled if they provided written informed consent to their GP.

## Statistical Analysis

Statistical analyses were performed in STATA (version 14; StataCorp, College Station, TX, USA).

Chi-square analysis or Fisher's exact test, 2-sided, were used to calculate the p-value for the difference between study groups in percentages of subjects reporting a pCAP or non pneumococcal pneumonia.

Logistic regression was used to calculate the unadjusted odds ratios (ORs) of vaccination together with 95% confidence intervals (95% CI). In the subgroup analysis, the matched ORs for vaccination in cases and

controls were calculated using conditional logistic regression, controlling for the presence of underlying conditions. Vaccine effectiveness was calculated as one minus the OR times 100%.

## RESULTS

From the 1,867 eligible adults identified over the two-year period, 226 consented to the study. Of these, 176 (77.9%) were admitted to Departments of Respiratory Medicine and 50 (22.1%) were registered with a GP. Pneumonia severity was low, moderate and high in 47 (20.8%), 167 (73.9%) and 12 (5.3%) adults, respectively. Of 226 enrolled patients, 40 were excluded as they were unable to provide a blood or a sputum/BAL sample, leaving 186 in the cohort for analyses. The median age of the cohort was 79 years (interquartile range, 73 to 85) and 65 (34.9%) were female. Twenty (10.8%) had received PCV13 and 60 (32.3%) had received PPSV23 <5 years prior to enrolment (Table 1).

**Table 1. Characteristics of adults with community-acquired pneumonia requiring hospitalization or managed in the community**

|                                                                         | Pneumococcal group<br>(N = 59) | Non-pneumococcal group<br>(N = 127) | CAP cohort<br>(N = 186) | P        |
|-------------------------------------------------------------------------|--------------------------------|-------------------------------------|-------------------------|----------|
| <b>Demographics</b>                                                     |                                |                                     |                         |          |
| Age years                                                               | 79 (71 to 83)                  | 79 (73 to 85)                       | 79 (73 to 85)           |          |
| Male                                                                    | 42 (71.2)                      | 79 (62.2)                           | 121 (65.1)              | 0.232    |
| <b>Reporting</b>                                                        |                                |                                     |                         |          |
| Hospital physicians                                                     | 38 (64.4)                      | 105 (82.7)                          | 143 (76.9)              | Referent |
| GPs                                                                     | 21 (35.6)                      | 22 (17.3)                           | 43 (23.1)               | 0.0059   |
| <b>Any underlying comorbidity*</b>                                      |                                |                                     |                         |          |
| Chronic heart disease                                                   | 28 (47.5)                      | 70 (55.1)                           | 98 (52.7)               | 0.33     |
| Chronic respiratory disease                                             | 29 (49.2)                      | 52 (40.9)                           | 81 (43.6)               | 0.293    |
| Diabetes                                                                | 14 (23.7)                      | 32 (25.2)                           | 46 (24.7)               | 0.829    |
| Chronic kidney disease                                                  | 2 (3.4)                        | 9 (7.1)                             | 11 (5.9)                | 0.32     |
| Chronic liver disease                                                   | 2 (3.4)                        | 3 (2.4)                             | 5 (2.6)                 | 0.687    |
| Malignancy                                                              | 0                              | 4 (3.1)                             | 4 (2.1)                 | 0.234    |
| Asplenia                                                                | 1 (1.7)                        | 1 (0.8)                             | 2 (1.1)                 | 0.576    |
| <b>Status regarding receipt of pneumococcal vaccination<sup>†</sup></b> |                                |                                     |                         |          |
| PCV13                                                                   | 5 (8.5)                        | 15 (11.8)                           | 20 (10.8)               | 0.452    |
| PPSV23 given <5 years prior to study enrolment                          | 20 (33.9)                      | 40 (31.5)                           | 60 (32.3)               | 0.853    |
| <b>Outcomes<sup>§</sup></b>                                             |                                |                                     |                         |          |
| 30-day mortality                                                        | 2 (3.4)                        | 2 (1.6)                             | 4 (2.2)                 | 0.480    |
| Recovery with <i>sequelae</i>                                           | 5 (8.5)                        | 20 (15.7)                           | 25 (13.4)               | 0.208    |

Data are number, median (interquartile range) or number (%). \*The groups were not mutually exclusive and therefore do not sum to 100%. <sup>†</sup>For both vaccines, patients were considered to be vaccinated if they had received the vaccine at least 2 weeks before enrolment. Data were missing for four patients in the non-pneumococcal group. One patient had received a dose of PCV13  $\geq 1$  year after receipt of a PPSV23 dose given <5 years prior to study enrolment. <sup>§</sup>Data were missing for 20 patients in the pneumococcal group and 40 patients in the non-pneumococcal group.

A nasopharyngeal swab was obtained from 171 of the 186 (91.9%) participants, a blood sample from 152 (81.7%), a sputum specimen from 139 (74.7%), and a BAL specimen from 3 (1.6%). *S. pneumoniae* was detected in 71 (41.5%) nasopharyngeal swab, 2 (1.3%) blood, 55 (39.6%) sputum, and 2 (66.7%) BAL.

Of 186 in the CAP cohort, 59 (31.7%, 95% CI 25.7 to 38.9%) adults were identified as pneumococcal CAP. More than half (31, 52.5%) had disease caused by one of the PCV7 serotypes, of which 23F, 9V, 14, 4 and 19F were the most common; 8 (13.6%) had CAP due to additional PCV13 serotypes, of which 19A and 3 were the most common; 9 (15.2%) had CAP due to serotypes only contained in PPSV23; 4 (6.8%) had non-vaccine-type disease; 7 (11.9%) had nontypeable pneumococcal CAP (Figure 1). Five had received one dose of PCV13 and 20 one dose of PPSV23 <5 years prior to enrolment. Of 39 patients infected with serotypes contained in PCV13, three had received this vaccine (disease caused by 9V in two cases and 23F in one) (Figure 1).

Baseline characteristics and outcomes were balanced between pneumococcal and non-pneumococcal groups (Table 1).

## Vaccines Effectiveness

VE estimate was 33.3% (95% CI -93.1% to 77.0%) against pneumococcal CAP irrespective of serotype and 54.2% (95% CI -210.2% to 93.2%) against vaccine-type CAP in the cohort of adults  $\geq 65$  years. PCV13 VE was 71.4% (95% CI -379.8% to 98.3%) with respect to VT-CAP in the age group at higher vaccine uptake (65-75 years).

The VE was 34.8% (95% CI -90.6% to 77.7%) against CAP due to any pneumococcal strain and 61.3% (95% CI -172.2% to 94.5%) against CAP due to vaccine-type strains for adults with underlying conditions.

PCV13 VE against the two primary end points in patients naïve to PPSV23 or vaccinated with PPSV23  $\geq 5$  years prior to enrolment was 27.5% (95% CI -117.9% to 75.9%) and 29% (95% CI -403.0% to 90.0%) respectively, lower than VE estimates in subgroups defined irrespective of PPSV23 immune status (Table 2).

**Table 2. PCV13 effectiveness estimates against all episodes of confirmed pneumococcal CAP and CAP due to vaccine serotypes in adults by vaccination status and the presence of underlying conditions**

|  | Cases<br>vaccinated/<br>unvaccinated | Controls<br>vaccinated/<br>unvaccinated | Vaccine<br>effective<br>ness | 95% CI |
|--|--------------------------------------|-----------------------------------------|------------------------------|--------|
|  |                                      |                                         |                              |        |

|                                                                                                          |      |                   |       |                  |
|----------------------------------------------------------------------------------------------------------|------|-------------------|-------|------------------|
| Pneumococcal CAP (any strain)                                                                            | 5/54 | 15/108*           | 33.3% | -93.1% to 77.0%  |
| Vaccine-type CAP                                                                                         | 3/36 | 2/11 <sup>†</sup> | 54.2% | -210.2% to 93.2% |
| Vaccine-type CAP in the age group at higher vaccine uptake (65-75 years)                                 | 2/14 | 1/2 <sup>†</sup>  | 71.4% | -379.8% to 98.3% |
| Pneumococcal CAP in patients with $\geq 1$ comorbid disorder                                             | 5/46 | 15/90*            | 34.8% | -90.6% to 77.7%  |
| Vaccine-type CAP in patients with $\geq 1$ comorbid disorder                                             | 3/31 | 2/8 <sup>†</sup>  | 61.3% | -172.2% to 94.5% |
| Pneumococcal CAP in patients naïve to PPSV23 or vaccinated with PPSV23 $\geq 5$ years prior to enrolment | 5/34 | 14/69*            | 27.5% | -117.9% to 75.9% |
| Vaccine-type CAP in patients naïve to PPSV23 or vaccinated with PPSV23 $\geq 5$ years prior to enrolment | 3/19 | 2/9 <sup>†</sup>  | 29.0% | -403.0% to 90.0% |

\*Controls were patients with an episode of non pneumococcal pneumonia. <sup>†</sup>Controls were patients with NVT pneumococcal CAP.

PPSV23 was not shown to have effectiveness against pneumococcal CAP in either all adults (VE -4.1%, 95% CI -104.9% to 47.2%) or those with comorbidities (VE -5.6%, 95 %CI: -117.4% to 48.8%) naïve to PCV13.

Subgroup analysis of 21 confirmed cases reported by GPs network (Table 1) provided evidence of effectiveness of PCV13 in preventing pneumococcal CAP managed in the community.

We identified 4,965 asymptomatic adults as potential controls, of whom 129 (2.6%) died and 95 (1.9%) were excluded because they left the GP's practice during the study period. Among the remaining 4,741 controls, 63 (three per case) were selected for the analysis.

Review of GP records showed that the controls were of similar age and gender to cases, but differed in other characteristics. One case (4.8%) and one control (1.6%) had received PCV13 at least 2 weeks before enrolment, whereas 18 controls (28.6%) were vaccinated during the study period. Sixteen cases (76.2%) and 36 controls (57.1%) had at least one comorbid disorder.

The overall effectiveness of PCV13 against disease due to any pneumococcal strain was 88.1% (95% CI 4.2% to 98.5%) and was 91.7% (95% CI 13.1% to 99.2%) when we controlled for underlying conditions (Figure 2).

## DISCUSSION

To our knowledge, this is the first study to investigate the effectiveness of PCV13 for prevention of invasive and non-invasive pneumococcal pneumonia among adults. Moreover, we estimated the vaccine effectiveness against confirmed pneumococcal CAP managed in the community, where most patients are treated as outpatients. Given that a substantial proportion of studies are based on hospitalised patients, the true burden of disease is not known in Europe, where only Finland, Spain and the UK have precise epidemiological data on CAP.[27-28]

Although several studies have reported a decline in the incidence of pneumococcal disease in adults following implementation of infant PCVs,[6-7] we identified no real-world studies evaluating the direct impact of an adult PCV13 vaccination programme. In this study, PCV13 serotypes accounted for 66% of all confirmed pneumococcal CAP. National Invasive Bacterial Diseases surveillance data from Italy showed that, despite an uncertain reduction in the proportion of PCV13 serotypes in the period 2010–2012, these were still responsible for about 56% of cases among over-65s.[15] These data suggest that PCV13 vaccine-type pneumococcal disease continues to have a high burden in adults in Italy despite childhood PCV13 vaccination and would indicate a lack of herd protection effects in older age groups, in comparison to the vaccinated paediatric population.[14-15, 29] The most recent data in the UK suggest that, despite an ongoing trend of reduced incidence of PCV13 serotype CAP from paediatric conjugate vaccines,[10, 30] PCV13 serotypes currently account for 12.6% of all cases of CAP and 41% of pneumococcal CAP in adults.[27] Adults aged  $\geq 65$  years may have therefore a great potential for disease reduction from PCV13 and may be a primary target of vaccination programmes.[18] This is particularly noteworthy for Italian population because the burden of CAP and pneumococcal disease in general is expected to increase with the aging society, even with the impact of childhood and adult vaccine programmes.[27, 31]

Moreover, in our study, most of CAP was caused by PCV13 serotypes 23F, 9V, 14, 19A, 4, 19F, and 3 (Figure 1) that are among the less susceptible to antibiotics.[32] Recent findings for Switzerland showed that, while non-susceptible serotypes 19A, 9V, 6B, 23F and 14 among invasive and non-invasive *S. pneumoniae* decreased over time in patients up to age 64 years vaccination due to PCVs infant

1  
2  
3 vaccination,[33-35] in patients older than 64 years with invasive *S. pneumoniae* resistance rates remained  
4 unchanged.[36] By preventing disease caused by resistant strains, adult PCV13 vaccination provides a robust  
5 strategy for combating antimicrobial resistance that is a growing problem in Europe.[37]  
6  
7

8  
9  
10 On January 19, 2017, PCV13 has been introduced into the routine vaccination schedule in Italy for all adults  
11 65 years of age followed by a dose of PPV23.[38] The decision-making regarding its introduction was based  
12 on the CAPITA trial results and the ACIP recommendations, but also on a long history of experience of adult  
13 pneumococcal conjugate vaccination in some Italian regions including Apulia.[13, 21]  
14  
15

16  
17  
18 In this prospective cohort study of adults with CAP we found that PCV13 was protective against all episodes  
19 of confirmed pneumococcal CAP (VE 33.3%) and against disease caused by serotypes contained in the  
20 vaccine (VE 54.2%). Recently published findings of the exploratory efficacy endpoint analysis of the  
21 CAPITA trial showed VE of 29% for all episodes of confirmed pneumococcal CAP and 43% for all non-  
22 bacteremic and noninvasive episodes of VT pneumococcal CAP,[39] findings consistent with the primary  
23 efficacy analysis.[18]  
24  
25  
26  
27  
28  
29

30  
31 Moreover, our results showed that PCV13 was effective for prevention of vaccine-type CAP already with  
32 modest levels of uptake in the target population (VE 71.4%). These data would suggest that rapid uptake and  
33 improved coverage of PCV13 among adults in the short term could maximize its impact.[20, 40]  
34  
35  
36  
37

38  
39 The incidence of pneumococcal CAP is greatly increased in many individual clinical risk groups.[41] Since  
40 when the ACIP recommended PCV13 for immunocompromised adults in 2012, there remains little evidence  
41 regarding the efficacy of the vaccine in at risk populations.[11, 18, 42] Our findings would suggest that  
42 vaccination with PCV13 is effective in preventing pneumococcal disease in adults  $\geq 65$  years with comorbid  
43 disorders. This observation, taken together with no effectiveness showed by PPV23 in our cohort, will  
44 require further studies to verify how adults with chronic diseases may fully benefit of the ACIP and the new  
45 Italian recommendations for the use of both PCV13 and PPSV23 in series. A recent systematic review and  
46 meta-analysis designed to estimate the efficacy of PPV23 in the prevention of pCAP, particularly in patients  
47 above 60 years of age and adults with underlying diseases, showed that PPV23 vaccination “alone” does not  
48  
49  
50  
51  
52  
53  
54  
55  
56  
57  
58  
59

1  
2  
3 demonstrate clear efficacy, supporting the administration of a dose of PCV13 first followed by a dose of  
4 PPV23 at least 8 weeks later.[2]

6  
7 Another recent systematic review of the burden of vaccine preventable pneumococcal disease in UK adults  
8 did not identify studies that were conducted in the community, where the majority of pCAP is managed.[27]  
9  
10 In our study, as it was designed to capture both invasive and non-invasive pneumococcal CAP,  
11 approximately 36% of cases had been reported by general practitioners, suggesting that hospital based  
12 studies may underestimate the true impact of pneumococcal disease. Subgroup analysis of cases managed in  
13 the community provided evidence that PCV13 had significant effectiveness with respect to CAP from any  
14 pneumococcal serotype and this value did not change when we controlled for the presence of underlying  
15 disorders.  
16  
17  
18  
19  
20  
21  
22

23 This study has several limitations. First, it was performed in a single region with a long-lasting history of  
24 experience of adult pneumococcal conjugate vaccination. Therefore, data from our setting may not be  
25 representative of the entire Italian adult population or generalizable to other settings. Moreover, data  
26 regarding the epidemiology of pCAP in adults in Italy are very limited and a large variability among  
27 published studies exists.[15]  
28  
29  
30  
31  
32

33  
34 Second, the study size was small reducing the power to detect statistically significant effects, although  
35 pneumococcal aetiology was identified in 31.7% CAP adults. Recent corresponding figure from Rodrigo et  
36 al. for UK was 29.3%.[10] The main limitation, however, pertains to the small numbers of PCV13  
37 vaccinated cases and controls underlying the estimation of the vaccine effectiveness accounting for wide  
38 95% CIs including zero. Although VE estimates should be interpreted with caution, our calculation reflected  
39 the still low PCV13 coverage achieved in the vaccinated cohorts. It was, therefore, too early to narrow the  
40 confidence limits around the point-estimate of effectiveness.  
41  
42  
43  
44  
45  
46  
47

48 Third, the test-negative method may overestimate VE if, by reducing the risk of acquiring VT serotypes,  
49 vaccination increases the risk of acquiring NVT as is likely to be the case if there is serotype replacement.  
50  
51

52 Fourth, we were not able to assess the effectiveness of individual vaccine serotypes, as there were too few  
53 cases to allow statistical comparison between study groups.  
54  
55  
56  
57  
58  
59  
60



1  
2  
3 Nonetheless, our study pointed out important gaps regarding the burden of pneumococcal CAP in Italy  
4 where there are limited data outside of national surveillance of IPD and the only available data for non-  
5 invasive disease are limited to hospitalization for pneumococcal pneumonia that, however, lack of serotyping  
6 information.[15] The active surveillance of adult confirmed CAP, drawn from a relative stable population  
7 over a two-year period, was a strength of our study and allowed us to assess the effectiveness of the 13-  
8 valent pneumococcal conjugate vaccine against all confirmed CAP, without regard to serotype, the presence  
9 of underlying conditions, and the site of patient management (hospital/community).

10  
11 Our results have clinical practice implications for pneumococcal vaccination policies in adults in countries  
12 where PCV13 is becoming part of routine immunization of the elderly. Additional studies are needed to  
13 confirm the direct vaccine benefits using surveillance and case-control designs.  
14  
15  
16  
17  
18  
19  
20  
21  
22  
23  
24  
25  
26  
27  
28  
29  
30  
31  
32  
33  
34  
35  
36  
37  
38  
39  
40  
41  
42  
43  
44  
45  
46  
47  
48  
49  
50  
51  
52  
53  
54  
55  
56  
57  
58  
59  
60

## ACKNOWLEDGEMENTS

We thank the patients who consented to participate in this study; the sentinel physicians for their contributions to the enrolment of patients and collection of data (Maria Aliani, Mario Bisconti, Donato Vincenzo Catamerò, Vittoria Rosaria Costa, Elio Costantino, Gaetano D'Ambrosio, Francesco Dadduzio, Antonio De Maria, Mario Domenico Dell'Orco, Mario Lucio Dell'Orco, Pier Luigi Di Napoli, Oronzo Filieri, Maria Pia Foschino Barbaro, Vincenzo Frappampina, Donato Lacedonia, Giuseppe Vincenzo Laera, Luciana Labate, Paolo Lombardi, Michele Maiellari, Orazio Lippolis, Francesco Mariani, Antonio Metrucci, Gabriele Miolli, Onofrio Resta, Luigi Santoiemma, Teresa Scarabaggio, Salvatore Talamo); Anna Lisa De Robertis for her valuable laboratory work.

## COMPETING INTERESTS

We have read and understood BMJ policy on declaration of interests and declare the following interests: RP reports grants from Pfizer, during the conduct of the study; grants, personal fees and non-financial support from Pfizer, personal fees and non-financial support from SanofiPasteurMSD, personal fees and non-financial support from GSK, outside the submitted work. DM reports grants and non-financial support from GSK, non-financial support from SanofiPasteurMSD, non-financial support from Pfizer, outside the submitted work. FF, MGC and MC declare that they have no competing interests.

## SUPPORT STATEMENT

This work was in part supported by Pfizer unrestricted Investigator-Initiated Research Grant IRR WS 2164183.

## CONTRIBUTORS

RP and DM conceptualised and designed the work, analysed and interpreted data, and writing the manuscript. FF and MGC contributed to the data collection, managed the database and provided statistical support. MC performed the laboratory work. All authors have read and approved the final manuscript.

1  
2  
3  
4  
5  
6  
7  
8  
9  
10  
11  
12  
13  
14  
15  
16  
17  
18  
19  
20  
21  
22  
23  
24  
25  
26  
27  
28  
29  
30  
31  
32  
33  
34  
35  
36  
37  
38  
39  
40  
41  
42  
43  
44  
45  
46  
47  
48  
49  
50  
51  
52  
53  
54  
55  
56  
57  
58  
59  
60

## DATA SHARING STATEMENT

There are no unpublished data available.

For peer review only

## REFERENCES

1. Namkoong H, Ishii M, Funatsu Y, et. Theory and strategy for Pneumococcal vaccines in the elderly. *Hum Vaccin Immunother* 2016;12(2):336-43. doi: <http://dx.doi.org/10.1080/21645515.2015.1075678>
2. Schiffner-Rohe J, Witt A, Hemmerling J, et al. Efficacy of PPV23 in Preventing Pneumococcal Pneumonia in Adults at Increased Risk. A Systematic Review and Meta-Analysis. *PLoS One* 2016;11(1):e0146338. doi: 10.1371/journal.pone.0146338.
3. Rozenbaum MH, Pechlivanoglou P, van der Werf TS, et al. The role of *Streptococcus pneumoniae* in community-acquired pneumonia among adults in Europe: a meta-analysis. *Eur J Clin Microbiol Infect Dis* 2013;32(3):305–16. doi: 10.1007/s10096-012-1778-4.
4. Torres A, Blasi F, Peetermans WE, et al. The aetiology and antibiotic management of community-acquired pneumonia in adults in Europe: a literature review. *Eur J Clin Microbiol Infect Dis* 2014;33(7):1065–79. doi: 10.1007/s10096-014-2067-1.
5. Cilloniz C, Polverino E, Ewig S, et al. Impact of age and comorbidity on cause and outcome in community-acquired pneumonia. *Chest* 2013;144(3):999–1007. doi: 10.1378/chest.13-0062.
6. Weil-Olivier C, Gaillat J. Can the success of pneumococcal conjugate vaccines for the prevention of pneumococcal diseases in children be extrapolated to adults? *Vaccine* 2014;32(18):2022-6. doi: 10.1016/j.vaccine.2014.02.008.
7. Griffin MR, Zhu Y, Moore MR, et al. U.S. hospitalizations for pneumonia after a decade of pneumococcal vaccination. *N Engl J Med* 2013;369(2):155-63. doi: 10.1056/NEJMoa1209165.
8. Jain S, Self WH, Wunderink RG, et al. Community-Acquired Pneumonia Requiring Hospitalization among U.S. Adults. *N Engl J Med* 2015;373(5):415-27. doi: 10.1056/NEJMoa1500245.
9. Tomczyk S, Bennett NM, Stoecker C, et al. Use of 13-valent pneumococcal conjugate vaccine and 23-valent pneumococcal polysaccharide vaccine among adults aged  $\geq 65$  years: recommendations of the Advisory Committee on Immunization Practices (ACIP). *MMWR Morb Mortal Wkly Rep* 2014;63(37):822-5.
10. Rodrigo C, Bewick T, Sheppard C, et al. Impact of infant 13-valent pneumococcal conjugate vaccine on serotypes in adult pneumonia. *Eur Respir J* 2015;45:1632-41. doi: 10.1183/09031936.00183614.

- 1  
2  
3 11. Joint Committee on Vaccination and Immunisation, Department of Health, UK. Interim JCVI statement  
4 on adult pneumococcal vaccination in the UK - November 2015. 2015. UK. Available from:  
5 [https://www.gov.uk/government/uploads/system/uploads/attachment\\_data/file/477966/JCVI\\_pnemococ](https://www.gov.uk/government/uploads/system/uploads/attachment_data/file/477966/JCVI_pnemococcal.pdf)  
6 [al.pdf](https://www.gov.uk/government/uploads/system/uploads/attachment_data/file/477966/JCVI_pnemococcal.pdf) (Accessed August 4, 2017).  
7  
8  
9
- 10  
11 12. Centro nazionale per la prevenzione delle malattie e la promozione della salute, Istituto superiore di  
12 sanità. Copertura vaccinale in Italia. Le vaccinazioni in Italia. 2016. Italy. Available from:  
13 [http://www.epicentro.iss.it/temi/vaccinazioni/dati\\_Ita.asp](http://www.epicentro.iss.it/temi/vaccinazioni/dati_Ita.asp) (Accessed August 4, 2017).  
14  
15
- 16  
17 13. Castiglia P. Recommendations for pneumococcal immunization outside routine childhood immunization  
18 programs in Western Europe. *Adv Ther* 2014;31(10):1011-44. doi: 10.1007/s12325-014-0157-1.  
19
- 20  
21 14. Prato R, Fortunato F, Martinelli D. Pneumococcal pneumonia prevention among adults: is the herd effect  
22 of pneumococcal conjugate vaccination in children as good a way as the active immunization of the  
23 elderly? *Curr Med Res Opin* 2016;32(3):543-5. doi: 10.1185/03007995.2015.1131150.  
24  
25
- 26  
27 15. Rota MC, Bella A, D'Ancona F, et al. Vaccini anti-pneumococcici: dati ed evidenze per l'utilizzo nei  
28 soggetti a rischio di qualsiasi età e per l'eventuale ampliamento dell'offerta ai soggetti anziani (dicembre  
29 2013). 2015. Roma: Istituto Superiore di Sanità. Rapporti ISTISAN 15/13. Available from:  
30 [http://www.iss.it/binary/publ/cont/15\\_13.pdf](http://www.iss.it/binary/publ/cont/15_13.pdf) (Accessed August 4, 2017).  
31  
32  
33
- 34  
35 16. Ewig S, Birkner N, Strauss R, et al. New perspectives on community-acquired pneumonia in 388 406  
36 patients. Results from a nationwide mandatory performance measurement programme in healthcare  
37 quality. *Thorax* 2009;64:1062-1069. doi: 10.1136/thx.2008.109785.  
38  
39
- 40  
41 17. Wroe PC, Finkelstein JA, Ray GT, et al. Aging population and future burden of pneumococcal  
42 pneumonia in the United States. *J Infect Dis* 2012;205(10):1589-92. doi: 10.1093/infdis/jis240.  
43
- 44  
45 18. Bonten MJ, Huijts SM, Bolkenbaas M, et al. Polysaccharide conjugate vaccine against pneumococcal  
46 pneumonia in adults. *N Engl J Med* 2015;372:1114-25. doi: 10.1056/NEJMoa1408544.  
47
- 48  
49 19. Kobayashi M, Bennett NM, Gierke R, et al. Intervals Between PCV13 and PPSV23 Vaccines:  
50 Recommendations of the Advisory Committee on Immunization Practices (ACIP). *MMWR Morb Mortal*  
51 *Wkly Rep* 2015;64(34):944-7. doi: 10.15585/mmwr.mm6434a4.  
52  
53
- 54  
55 20. Pilishvili T, Bennett NM. Pneumococcal disease prevention among adults: strategies for the use of  
56 pneumococcal vaccines. *Vaccine* 2015;33 Suppl 4:D60-5. doi: 10.1016/j.vaccine.2015.05.102.  
57  
58  
59

- 1  
2  
3 21. Deliberazione della Giunta Regionale 20 maggio 2014, n. 95. Commissione Regionale Vaccini.  
4 Modifica Calendario Regionale per la vita 2012 - DGR 241/2013. Approvazione nuovo Calendario  
5 Vaccinale per la vita 2014. Bollettino Ufficiale della Regione Puglia n. 74 of 11/06/2014. 2014. Italy.  
6 Available from: [http://beta.regione.puglia.it/documents/10180/4782589/N74\\_11\\_06\\_14.pdf](http://beta.regione.puglia.it/documents/10180/4782589/N74_11_06_14.pdf) (Accessed  
7 August 4, 2017).  
8  
9  
10  
11  
12 22. Osservatorio Epidemiologico della regione Puglia. Bollettino delle Coperture Vaccinali - Resoconto sul  
13 monitoraggio delle attività vaccinali regionali condotte negli anni 2007-2015. 2016. Italy. Available  
14 from: <https://www.sanita.puglia.it/documents/36126/269121/Bollettino+delle+Coperture+Vaccinali+-+Anni+2007+-+2015/f078e7d1-a19c-40de-8246-a2ae36278024?version=1.0&t=1491399965137>  
15  
16  
17  
18  
19 (Accessed August 4, 2017).  
20  
21  
22 23. Istituto Nazionale di Statistica. Popolazione Residente per età, sesso e stato civile al 1° gennaio 2015.  
23 2015. <http://www.demoistat.it>. (Accessed August 4, 2017).  
24  
25  
26 24. Chow AW, Hall CB, Klein JO, et al. Evaluation of new anti-infective drugs for the treatment of  
27 respiratory tract infections. Infectious Diseases Society of America and the Food and Drug  
28 Administration. *Clin Infect Dis* 1992;15(Suppl 1):S62-88.  
29  
30  
31 25. Pai R, Gertz RE, Beall B. Sequential multiplex PCR approach for determining capsular serotypes of  
32 *Streptococcus pneumoniae* isolates. *J Clin Microbiol* 2006;44:124-31. doi:  
33 <http://dx.doi.org/10.1128/JCM.44.1.124-131.2006>.  
34  
35  
36 26. Mavroidi A, Godoy D, Aanensen DM, et al. Evolutionary genetics of the capsular locus of serogroup 6  
37 pneumococci. *J Bacteriol* 2004;186:8181-92. doi: <http://dx.doi.org/10.1128/JB.186.24.8181-8192.2004>.  
38  
39  
40 27. Chalmers JD, Campling J, Dicker A, et al. A systematic review of the burden of vaccine preventable  
41 pneumococcal disease in UK adults. *BMC Pulm Med* 2016;16(1):77. doi: 10.1186/s12890-016-0242-0.  
42  
43  
44 28. Welte T, Torres A, Nathwani D. Clinical and economic burden of community-acquired pneumonia  
45 among adults in Europe. *Thorax* 2012;67(1):71-9. doi: 10.1136/thx.2009.129502.  
46  
47  
48 29. Fortunato F, Martinelli D, Cappelli MG, et al. Impact of pneumococcal conjugate universal routine  
49 vaccination on pneumococcal disease in Italian children. *J Immunol Res* 2015;2015:206757. doi:  
50 <http://dx.doi.org/10.1155/2015/206757>.  
51  
52  
53  
54  
55  
56  
57  
58  
59  
60

- 1  
2  
3 30. Waight PA, Andrews NJ, Ladhani SN, et al. Effect of the 13-valent pneumococcal conjugate vaccine on  
4  
5  
6  
7  
8  
9  
10  
11  
12  
13  
14  
15  
16  
17  
18  
19  
20  
21  
22  
23  
24  
25  
26  
27  
28  
29  
30  
31  
32  
33  
34  
35  
36  
37  
38  
39  
40  
41  
42  
43  
44  
45  
46  
47  
48  
49  
50  
51  
52  
53  
54  
55  
56  
57  
58  
59  
60
30. Waight PA, Andrews NJ, Ladhani SN, et al. Effect of the 13-valent pneumococcal conjugate vaccine on  
invasive pneumococcal disease in England and Wales 4 years after its introduction: an observational  
cohort study. *Lancet Infect Dis* 2015;15(5):535–43. doi: [http://dx.doi.org/10.1016/S1473-3099\(15\)70044-7](http://dx.doi.org/10.1016/S1473-3099(15)70044-7).
31. Institute for Health Metrics and Evaluation (IHME). Life Expectancy & Probability of Death. Seattle,  
WA: IHME, University of Washington. 2017. Available from: <http://vizhub.healthdata.org/le/> (Accessed  
August 4, 2017).
32. Song JH, Dagan R, Klugman KP, Fritzell B. The relationship between pneumococcal serotypes and  
antibiotic resistance. *Vaccine* 2012;30(17):2728-37. doi: 10.1016/j.vaccine.2012.01.091.
33. Hauser C, Kronenberg A, Allemann A, et al. Serotype/serogroup-specific antibiotic non-susceptibility of  
invasive and non-invasive *Streptococcus pneumoniae*, Switzerland, 2004 to 2014. *Euro Surveill*  
2016;21(21):pii=30239. doi: <http://dx.doi.org/10.2807/1560-7917.ES.2016.21.21.30239>.
34. Kyaw MH, Lynfield R, Schaffner W, et al. Effect of introduction of the pneumococcal conjugate vaccine  
on drug-resistant *Streptococcus pneumoniae*. *N Engl J Med* 2006;354(14):1455-63. doi:  
10.1056/NEJMoa051642.
35. Dagan R, Juergens C, Trammel J, et al. Efficacy of 13-valent pneumococcal conjugate vaccine (PCV13)  
versus that of 7-valent PCV (PCV7) against nasopharyngeal colonization of antibiotic nonsusceptible  
*Streptococcus pneumoniae*. *J Infect Dis* 2015;211(7):1144-53. doi: 10.1093/infdis/jiu576.
36. Meichtry J, Born R, Küffer M, et al. Serotype epidemiology of invasive pneumococcal disease in Swiss  
adults: a nationwide population-based study. *Vaccine* 2014;32(40):5185-91. doi:  
10.1016/j.vaccine.2014.07.060.
37. European Centre for Disease Prevention and Control. Antimicrobial resistance surveillance in Europe  
2015. Annual Report of the European Antimicrobial Resistance Surveillance Network (EARS-Net).  
Stockholm: ECDC. 2017. Available from:  
<http://ecdc.europa.eu/en/publications/Publications/antimicrobial-resistance-europe-2015.pdf> (Accessed  
August 4, 2017).
38. Intesa, ai sensi dell'articolo 8, comma 6, della legge 5 giugno 2003, n. 131, tra il Governo, le regioni e le  
province autonome di Trento e Bolzano sul documento recante «Piano nazionale prevenzione vaccinale

- 1  
2  
3 2017-2019», GU Serie Generale n. 41 del 18-2-2017. 2017. Italy. Available from:  
4 <http://www.trovanorme.salute.gov.it/norme/dettaglioAtto?id=58185&completo=true> (Accessed August  
5 4, 2017).  
6  
7  
8  
9 39. Webber C, Patton M, Patterson S, et al. Exploratory efficacy endpoints in the Community-Acquired  
10 Pneumonia Immunization Trial in Adults (CAPiTA). *Vaccine* 2017;35(9):1266-1272. doi:  
11 10.1016/j.vaccine.2017.01.032.  
12  
13 40. Mendes RE, Hollingsworth RC, Costello A, et al. Noninvasive *Streptococcus pneumoniae* serotypes  
14 recovered from hospitalized adult patients in the United States in 2009 to 2012. *Antimicrob Agents*  
15 *Chemother* 2015;59:5595-601. doi: 10.1128/AAC.00182-15  
16  
17 41. Torres A, Blasi F, Dartois N, Akova M. Which individuals are at increased risk of pneumococcal disease  
18 and why? Impact of COPD, asthma, smoking, diabetes, and/or chronic heart disease on community-  
19 cquired pneumonia and invasive pneumococcal disease. *Thorax* 2015;70:984-9. doi: 10.1136/thoraxjnl-  
20 2015-206780  
21  
22 42. Baldo V, Cocchio S, Gallo T, et al. Pneumococcal Conjugated Vaccine Reduces the High Mortality for  
23 Community-Acquired Pneumonia in the Elderly: an Italian Regional Experience. *PLoS ONE* 2016.  
24 11(11):e0166637. doi: 10.1371/journal.pone.016663.  
25  
26  
27  
28  
29  
30  
31  
32  
33  
34  
35  
36  
37  
38  
39  
40  
41  
42  
43  
44  
45  
46  
47  
48  
49  
50  
51  
52  
53  
54  
55  
56  
57  
58  
59  
60



1  
2  
3 **Figure 1. Number of cases of pneumococcal CAP by serotype and vaccination status (N=59)**  
4  
5

6 **Figure 2. PCV13 effectiveness (%) estimates against CAP due to any pneumococcal strain managed in the**  
7 **community\***  
8  
9

10 \* Fourteen cases (66.7%) had CAP caused by one of the PCV7 serotypes, of which 14 and 9V were the most common;  
11 three cases (14.3%) were due to additional PCV13 serotype 19A; three cases (14.3%) had CAP due to other serotypes;  
12 one (4.7%) had nontypeable pneumococcal CAP. One case vaccinated with PCV13 was caused by serotype 12F.  
13  
14  
15  
16  
17  
18  
19  
20  
21  
22  
23  
24  
25  
26  
27  
28  
29  
30  
31  
32  
33  
34  
35  
36  
37  
38  
39  
40  
41  
42  
43  
44  
45  
46  
47  
48  
49  
50  
51  
52  
53  
54  
55  
56  
57  
58  
59  
60

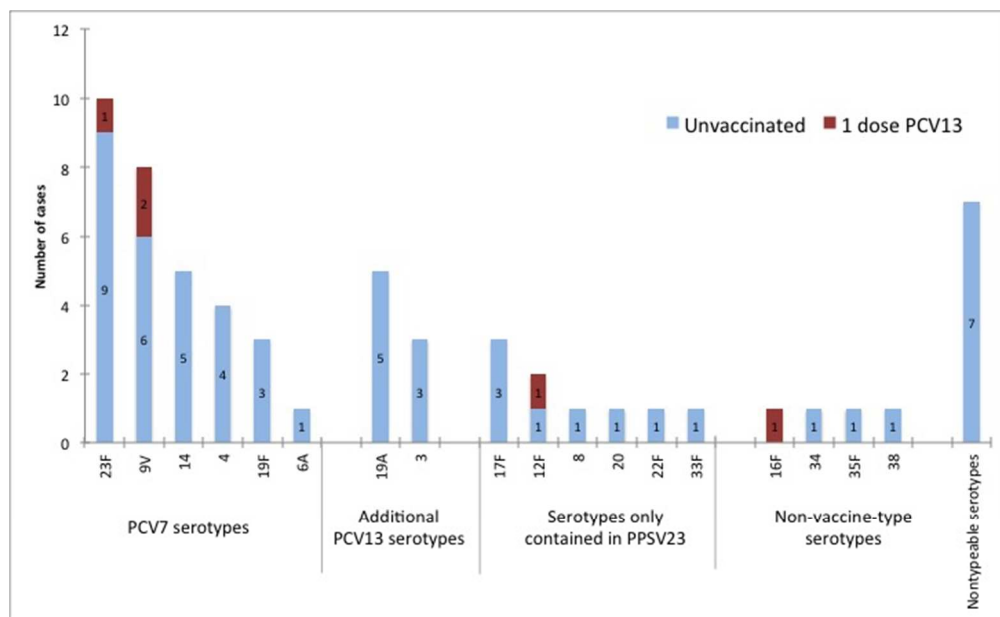

Figure 1. Number of cases of pneumococcal CAP by serotype and vaccination status (N=59)

256x156mm (72 x 72 DPI)

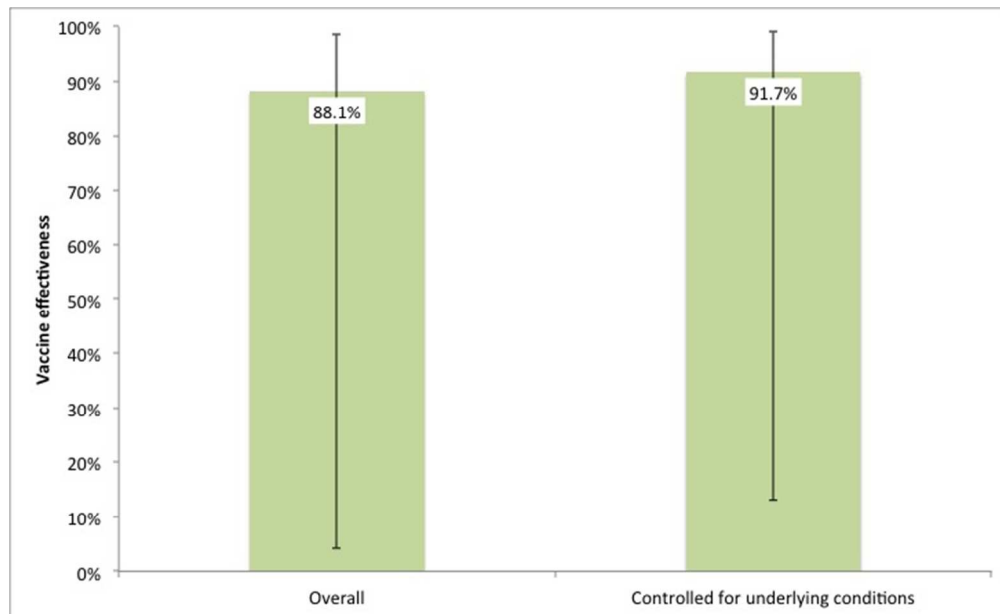

Figure 2. PCV13 effectiveness (%) estimates against CAP due to any pneumococcal strain managed in the community\*

\* Fourteen cases (66.7%) had CAP caused by one of the PCV7 serotypes, of which 14 and 9V were the most common; three cases (14.3%) were due to additional PCV13 serotype 19A; three cases (14.3%) had CAP due to other serotypes; one (4.7%) had nontypeable pneumococcal CAP. One case vaccinated with PCV13 was caused by serotype 12F.

256x156mm (72 x 72 DPI)

**STROBE 2007 (v4) Statement—Checklist of items that should be included in reports of *cohort studies***

| Section/Topic                | Item # | Recommendation                                                                                                                                                                       | Reported on page # |
|------------------------------|--------|--------------------------------------------------------------------------------------------------------------------------------------------------------------------------------------|--------------------|
| Title and abstract           | 1      | (a) Indicate the study's design with a commonly used term in the title or the abstract                                                                                               | 1                  |
|                              |        | (b) Provide in the abstract an informative and balanced summary of what was done and what was found                                                                                  | 2                  |
| <b>Introduction</b>          |        |                                                                                                                                                                                      |                    |
| Background/rationale         | 2      | Explain the scientific background and rationale for the investigation being reported                                                                                                 | 4-5                |
| Objectives                   | 3      | State specific objectives, including any prespecified hypotheses                                                                                                                     | 5                  |
| <b>Methods</b>               |        |                                                                                                                                                                                      |                    |
| Study design                 | 4      | Present key elements of study design early in the paper                                                                                                                              | 6                  |
| Setting                      | 5      | Describe the setting, locations, and relevant dates, including periods of recruitment, exposure, follow-up, and data collection                                                      | 6                  |
| Participants                 | 6      | (a) Give the eligibility criteria, and the sources and methods of selection of participants. Describe methods of follow-up                                                           | 6                  |
|                              |        | (b) For matched studies, give matching criteria and number of exposed and unexposed                                                                                                  | 8                  |
| Variables                    | 7      | Clearly define all outcomes, exposures, predictors, potential confounders, and effect modifiers. Give diagnostic criteria, if applicable                                             | 6-8                |
| Data sources/<br>measurement | 8*     | For each variable of interest, give sources of data and details of methods of assessment (measurement). Describe comparability of assessment methods if there is more than one group | 6-8                |
| Bias                         | 9      | Describe any efforts to address potential sources of bias                                                                                                                            | 8-9                |
| Study size                   | 10     | Explain how the study size was arrived at                                                                                                                                            | 8-9                |
| Quantitative variables       | 11     | Explain how quantitative variables were handled in the analyses. If applicable, describe which groupings were chosen and why                                                         | 8-9                |
| Statistical methods          | 12     | (a) Describe all statistical methods, including those used to control for confounding                                                                                                | 8-9                |
|                              |        | (b) Describe any methods used to examine subgroups and interactions                                                                                                                  | 8-9                |
|                              |        | (c) Explain how missing data were addressed                                                                                                                                          | 8-9                |
|                              |        | (d) If applicable, explain how loss to follow-up was addressed                                                                                                                       | 8-9                |
|                              |        | (e) Describe any sensitivity analyses                                                                                                                                                | -                  |
| <b>Results</b>               |        |                                                                                                                                                                                      |                    |

|                          |     |                                                                                                                                                                                                              |       |
|--------------------------|-----|--------------------------------------------------------------------------------------------------------------------------------------------------------------------------------------------------------------|-------|
| Participants             | 13* | (a) Report numbers of individuals at each stage of study—eg numbers potentially eligible, examined for eligibility, confirmed eligible, included in the study, completing follow-up, and analysed            | 9     |
|                          |     | (b) Give reasons for non-participation at each stage                                                                                                                                                         | 9     |
|                          |     | (c) Consider use of a flow diagram                                                                                                                                                                           | -     |
| Descriptive data         | 14* | (a) Give characteristics of study participants (eg demographic, clinical, social) and information on exposures and potential confounders                                                                     | 9     |
|                          |     | (b) Indicate number of participants with missing data for each variable of interest                                                                                                                          | 9     |
|                          |     | (c) Summarise follow-up time (eg, average and total amount)                                                                                                                                                  | -     |
| Outcome data             | 15* | Report numbers of outcome events or summary measures over time                                                                                                                                               | 9     |
| Main results             | 16  | (a) Give unadjusted estimates and, if applicable, confounder-adjusted estimates and their precision (eg, 95% confidence interval). Make clear which confounders were adjusted for and why they were included | 10-11 |
|                          |     | (b) Report category boundaries when continuous variables were categorized                                                                                                                                    | 9     |
|                          |     | (c) If relevant, consider translating estimates of relative risk into absolute risk for a meaningful time period                                                                                             | -     |
| Other analyses           | 17  | Report other analyses done—eg analyses of subgroups and interactions, and sensitivity analyses                                                                                                               | 11    |
| <b>Discussion</b>        |     |                                                                                                                                                                                                              |       |
| Key results              | 18  | Summarise key results with reference to study objectives                                                                                                                                                     | 12-14 |
| <b>Limitations</b>       |     |                                                                                                                                                                                                              |       |
| Interpretation           | 20  | Give a cautious overall interpretation of results considering objectives, limitations, multiplicity of analyses, results from similar studies, and other relevant evidence                                   | 14    |
| Generalisability         | 21  | Discuss the generalisability (external validity) of the study results                                                                                                                                        | 15    |
| <b>Other information</b> |     |                                                                                                                                                                                                              |       |
| Funding                  | 22  | Give the source of funding and the role of the funders for the present study and, if applicable, for the original study on which the present article is based                                                | 16    |

\*Give information separately for cases and controls in case-control studies and, if applicable, for exposed and unexposed groups in cohort and cross-sectional studies.

**Note:** An Explanation and Elaboration article discusses each checklist item and gives methodological background and published examples of transparent reporting. The STROBE checklist is best used in conjunction with this article (freely available on the Web sites of PLoS Medicine at <http://www.plosmedicine.org/>, Annals of Internal Medicine at <http://www.annals.org/>, and Epidemiology at <http://www.epidem.com/>). Information on the STROBE Initiative is available at [www.strobe-statement.org](http://www.strobe-statement.org).

# BMJ Open

## Effectiveness of the 13-valent pneumococcal conjugate vaccine against adult pneumonia in Italy: a case-control study in a two-year prospective cohort

|                                 |                                                                                                                                                                                                                                                                                                                                                                                                                                                                                                                  |
|---------------------------------|------------------------------------------------------------------------------------------------------------------------------------------------------------------------------------------------------------------------------------------------------------------------------------------------------------------------------------------------------------------------------------------------------------------------------------------------------------------------------------------------------------------|
| Journal:                        | <i>BMJ Open</i>                                                                                                                                                                                                                                                                                                                                                                                                                                                                                                  |
| Manuscript ID                   | bmjopen-2017-019034.R1                                                                                                                                                                                                                                                                                                                                                                                                                                                                                           |
| Article Type:                   | Research                                                                                                                                                                                                                                                                                                                                                                                                                                                                                                         |
| Date Submitted by the Author:   | 22-Dec-2017                                                                                                                                                                                                                                                                                                                                                                                                                                                                                                      |
| Complete List of Authors:       | Prato, Rosa; University of Foggia, Department of Medical and Surgical Sciences<br>Fortunato, Francesca; Università degli Studi di Foggia, Department of Medical and Surgical Sciences<br>Cappelli, Maria; Università degli Studi di Foggia, Department of Medical and Surgical Sciences<br>Chironna, Maria; Università degli Studi di Bari Aldo Moro, Department of Biomedical Science and Human Oncology<br>Martinelli, Domenico; Università degli Studi di Foggia, Department of Medical and Surgical Sciences |
| <b>Primary Subject Heading</b>: | Infectious diseases                                                                                                                                                                                                                                                                                                                                                                                                                                                                                              |
| Secondary Subject Heading:      | Public health, Epidemiology                                                                                                                                                                                                                                                                                                                                                                                                                                                                                      |
| Keywords:                       | PCV13, Pneumococcal conjugate vaccine, Vaccine effectiveness, Adult, Community-acquired pneumonia                                                                                                                                                                                                                                                                                                                                                                                                                |
|                                 |                                                                                                                                                                                                                                                                                                                                                                                                                                                                                                                  |

SCHOLARONE™  
Manuscripts



1  
2  
3 Effectiveness of the 13-valent pneumococcal conjugate vaccine  
4  
5  
6  
7 against adult pneumonia in Italy: a case-control study in a two-  
8  
9  
10 year prospective cohort  
11  
12  
13  
14  
15

16 Rosa Prato<sup>1\*</sup>, Francesca Fortunato<sup>1</sup>, Maria Giovanna Cappelli<sup>1</sup>, Maria Chironna<sup>2</sup>, Domenico Martinelli<sup>1</sup>  
17

18 <sup>1</sup> Department of Medical and Surgical Sciences, University of Foggia, Foggia, Italy

19 <sup>2</sup> Department of Biomedical Science and Human Oncology, Aldo Moro University of Bari, Bari, Italy  
20  
21

22 **\*Corresponding Author**

23 Rosa Prato

24 Dipartimento di Scienze Mediche e Chirurgiche, Università degli Studi di Foggia

25 Polo Biomedico "E. Altomare" - Viale L. Pinto, 71122 – Foggia

26 Tel.: +39 (0)881 588036 – Fax. +39 (0)881 588047

27 E-mail: [rosa.prato@unifg.it](mailto:rosa.prato@unifg.it)  
28  
29  
30  
31  
32  
33  
34  
35  
36  
37  
38  
39  
40  
41  
42  
43  
44  
45  
46  
47  
48  
49  
50  
51  
52  
53  
54  
55  
56  
57  
58  
59  
60

## Abstract

**Objectives** Current strategies to prevent adult pneumococcal disease have been recently reviewed in Italy. We did a post-licensure study to estimate the direct effectiveness (VE) of the 13-valent pneumococcal conjugate vaccine (PCV13) against adult pneumococcal community-acquired pneumonia (pCAP).

**Study design** Between 2013-2015, a two-year prospective cohort study of adults with CAP was conducted in the Apulia region of Italy where the average vaccine uptake of PCV13 was 32% among adults  $\geq 65$  years. The test-negative design was used to estimate VE against all episodes of confirmed pCAP and vaccine-type (VT) CAP. VE in a subgroup of patients managed in the community was also estimated using a matched case-control design. VE was calculated as one minus the OR times 100%.

**Results** The overall VE of PCV13 was 33.2% (95% CI -106.6% to 82%) against pCAP irrespective of serotype and 38.1% (95% CI -131.9% to 89%) against VT-CAP in the cohort of adults  $\geq 65$  years. The VE was 42.3% (95% CI -244.1% to 94.7%) against VT-CAP in the age group at higher vaccine uptake. For the subgroup of cases managed in the community, the overall VE against disease due to any pneumococcal strain was 88.1% (95% CI 4.2% to 98.5%) and 91.7% (95% CI 13.1% to 99.2%) when we controlled for underlying conditions.

**Conclusions** Although our results are non-significant, PCV13 promises to be effective against all confirmed pCAP already with modest levels of uptake in the population of adults  $\geq 65$  years of age. Larger studies are needed to confirm the direct vaccine benefits.

**Keywords** PCV13, Pneumococcal conjugate vaccine, Vaccine effectiveness, Adult, Italy, Community-acquired pneumonia



## Strengths and limitation of this study

- The test-negative method used in this study has reduced the risk for selection bias since both cases and controls were recruited in one process and arose from the whole population when the same enrolment criteria were met.
- The study was designed to capture CAP cases managed in the community, reducing the underestimate of the true impact of pneumococcal disease.
- The active surveillance of CAP was performed in a single regional setting leading to a small study size reducing the power to detect statistically significant effects.
- The test-negative method may have overestimated PCV13 VE if, by reducing the risk of acquiring vaccine-type serotypes, vaccination increases the risk of acquiring non vaccine-type serotypes as is likely to be the case if there is serotype replacement.

## INTRODUCTION

Routine administration of the 7-valent conjugate vaccine (PCV7) since 2000 and of the second-generation conjugate vaccines (PCV10 and PCV13) since 2010 has resulted in an overall reduction in the rates of pneumococcal disease in both vaccinated and unvaccinated children, and indirectly among adults in several countries, owing to herd immunity.[1-2] However, the most recent available data suggest that significant burden still results from pneumococcal infection in older adults.

In the United States, the annual incidence of community-acquired pneumonia (CAP) requiring hospitalization in 2010-2012 was 24.8 cases (95% CI 23.5 to 26.1) per 10,000 adults 18 years of age or older, with a prevalence of pneumococcal disease of 5% and an incidence that was almost 5 times as high among adults 65 years of age or older as among younger adults.[3] In 2013, an estimated 10% of CAP cases in adults aged  $\geq 65$  years were caused by *S. pneumoniae* serotypes potentially preventable with the use of PCV13 in this population.[4]

In the UK, incidence of adult pneumococcal pneumonia declined over the 2008-2013 period, with serotypes included in PCV13 declining post-PCV13 introduction, suggesting an early herd protection effect from infant PCV13 on adult bacteraemic and non-bacteraemic disease. However, the most recent available data from 2012-2013 showed an incidence of 20.6 per 100,000 population for hospitalized adult pneumococcal CAP and 8.6 per 100,000 population for PCV13 serotype CAP.[5]

In Italy, high infant PCV13 coverage has been achieved since 2011 (vaccine uptake rate 90-95%).[6] For adults, only PPSV23 was recommended for routine immunization of those aged  $\geq 65$  years and at-risk individuals, but the vaccine uptake rates have been low to date. In recent years, some Italian regions have recommended PCV13 to adults with underlying diseases and to the elderly.[7]

Impact of PCV infant vaccination on adult pneumococcal pneumonia has not been well established in Italy. The hospitalization rates for pneumococcal pneumonia in the elderly population have remained relatively stable over the past decade, indicating a lack of herd protection amongst older age groups.[8]

In 2014, the CAPITA trial conducted in the Netherlands demonstrated the efficacy of PCV13 for the prevention, in those aged  $\geq 65$ , of vaccine-type pneumococcal CAP.[9] Evidence from the CAPITA trial led to new ACIP PCV13 recommendations,[4, 10-11] of which a review is planned for 2018 owing to potential

1  
2  
3 changes in the epidemiological situation. In particular, studies evaluating the post-licensure effectiveness of  
4 PCV13 for prevention of invasive and non-bacteremic pneumococcal pneumonia among adults  $\geq 65$  years old  
5 using a case control design are needed.[11] This study attempts to address this unmet need.  
6  
7

8  
9 We report findings of the direct impact of PCV13 from a two-year prospective study of a cohort of  
10 pneumococcal CAP adults.  
11  
12

## 13 14 15 16 17 **Methods** 18 19

20  
21 From January 2013 until January 2015, a prospective, multicenter, population-based, active surveillance  
22 study of adults with CAP was conducted over two years in Apulia, a large Italian region of approximately  
23 4,000,000 inhabitants. PPSV23 was introduced in Apulia in 2000 for use in adults aged  $\geq 65$  years and was  
24 replaced by PCV13 in November 2011 for adults aged 65, 70, and  $\geq 75$  years.[12] In 2015, the average  
25 vaccine uptake of PCV13 was 32% amongst adults aged 65-75 years (11 cohorts) and 10% in the overall  
26 population  $> 75$  years.[13]  
27  
28  
29  
30  
31

32  
33 According to 2013 census figures, the designated surveillance area included about 788,000 adults 65 years of  
34 age or older.[14] Patients were enrolled in two different study settings from a network of 31 sentinel  
35 physicians. Surveillance for suspected CAP was conducted by 16 treating physicians among patients  
36 presenting at 13 hospitals located in the region (a total of 13,841 patients aged  $\geq 65$  years admitted to  
37 Departments of Respiratory Medicine in 2013-2014) and by 15 general practitioners (GPs) providing  
38 primary care for a total of 5,010 persons aged  $\geq 65$  years throughout the region.  
39  
40  
41  
42  
43  
44

45 Adults  $\geq 65$  years with symptoms suggestive of lower respiratory tract infection were eligible for enrolment if  
46 they presented to a study hospital or to their GP for a clinical assessment; resided in the study region; had at  
47 least two of the eleven clinical criteria listed in Box 1; and had evidence of new infiltrates on chest  
48 radiography consistent with pneumonia.[15] Patients were excluded if they had been hospitalized recently  
49 ( $< 10$  days) or were functionally dependent nursing home, long-term care facility, or other institution  
50 residents (healthcare-associated pneumonia cases).  
51  
52  
53  
54  
55  
56

### 57 **Box 1. Clinical criteria for definition of CAP** 58

- New cough or sputum production
- Fever  $>38.0^{\circ}\text{C}$  or hypothermia  $<36.1^{\circ}\text{C}$
- Chest pain
- Dyspnea
- Tachypnea
- New altered mental status
- Abnormal lung examination
- Respiratory failure
- Leukocytosis ( $>10 \times 10^9$  white blood cells/liter or  $>15\%$  bands) or leukopenia ( $<4.5 \times 10^9$  white blood cells/liter)
- C-reactive protein value  $>3$  times the upper limit of normal
- Hypoxemia with a partial oxygen pressure  $<60$  mm Hg while the patient was breathing room air

Written informed consent was obtained from all the patients or their caregivers before enrolment. Study sentinel physicians used a standardised electronic Case Report Form to collect information regarding patient demographics, clinical information, microbiological investigations and status regarding receipt of pneumococcal vaccination; pneumonia severity was assessed using the CURB-65 score (Confusion, Urea  $>7$  mmol/L, Respiratory rate  $\geq 30$  breaths/min, low systolic  $<90$  mm Hg or diastolic  $\leq 60$  mm Hg Blood pressure, age  $\geq 65$  years). Patients were contacted 30 days after enrolment for outcome measures collection (30-day mortality, recovery with *sequelae*).

The study protocol was approved by the Institutional Review Board at the Apulian Regional Observatory for Epidemiology (PROT:18/OER/2012 February 20, 2012). The study was conducted according to the principles expressed in the Declaration of Helsinki.

Blood samples and nasopharyngeal swabs were obtained from the patients who presented to sentinel centers/GPs with symptoms of lower respiratory tract infection within 24 hours after presentation. In the case of patients with a productive cough, sputum was obtained. Bronchoalveolar-lavage (BAL) samples, blood-culture and sputum specimens that had been obtained for clinical care were sent to the Regional Reference Laboratory for Invasive Bacterial Diseases and analysed for the study.

*S. pneumoniae* was isolated by PCR and multiplex sequential PCR. Bacterial genomic DNA was extracted from 200  $\mu\text{l}$  of biological samples using the QIAamp Dneasy Blood and Tissue kit (Qiagen), according to the manufacturer's instructions. Detection of *S. pneumoniae* was performed using a commercial multiplex assay (Pneumobacter ACE Detection for blood and Meningitis ACE Detection for CSF, Seegene; Sensitivity: detection limit of the Seeplex Pneumobacter Ace Detection = 10 copy/reaction – 10 copy/3  $\mu\text{l}$  DNA). *S.*

1  
2  
3 *pneumoniae* serotyping was performed on PCR positive samples through a sequential multiplex PCR.[16]  
4  
5 Twenty-nine primer pairs were designed to target serotypes 1, 3, 4, 5, 6 A/B, 7F, 7C, 8, 9V, 10A, 11A, 12F,  
6  
7 14, 15A, 15 B/C, 16F, 17F, 18, 19A, 19F, 20, 22F, 23F, 31, 33F, 34, 35B, 35F, and 38. A primer pair  
8  
9 (primers cpsA-f and cpsA-r) was also included as an internal control targeting the cpsA (pneumococcal  
10  
11 capsular polysaccharide synthesis gene) locus found in all pneumococci.[17] The amplified products, ranging  
12  
13 from 250 bp to 988 bp, were analyzed by means of electrophoresis on a 2% agarose gel (Life Technologies)  
14  
15 and visualization under UV light.

16  
17 Patients with a positive PCR result for *S. pneumoniae* on blood/sputum/BAL were deemed to have  
18  
19 pneumococcal CAP. Nasopharyngeal swabs samples were not used for the diagnosis of pCAP, due to the  
20  
21 poor sensitivity and specificity previously reported.[3]  
22  
23

## 24 **Vaccine Effectiveness analysis**

25  
26  
27 To estimate the vaccine effectiveness (VE) of PCV13 in the prevention of pneumococcal CAP, a test-  
28  
29 negative design was performed on cases enrolled during the study surveillance period. The analysis included  
30  
31 two primary end points:  
32

- 33 I. **VE in preventing confirmed pneumococcal CAP irrespective of serotype**, where cases were patients  
34  
35 who had an episode of invasive or non-invasive pCAP due to any pneumococcal strain and controls were  
36  
37 participants with an episode of non pneumococcal pneumonia;  
38
- 39 II. **VE in preventing confirmed vaccine-type (VT) CAP**, where cases were patients with an episode of  
40  
41 invasive or non-invasive pCAP due to vaccine-type strains and controls were patients with non-vaccine-  
42  
43 type (NVT) pneumococcal CAP, non-typable isolates or non pneumococcal pneumonia.  
44

45  
46 These two end points were further assessed among patients who had underlying conditions.  
47

48  
49 The exposure of interest was vaccination with PCV13. The exposure to PPSV23 given <5 years prior to  
50  
51 study enrolment was also assessed. Data were based on verified vaccine (both PCV13 and PPSV23)  
52  
53 information and not self-report.  
54

55  
56 To further study the effectiveness of PCV13 in the prevention of episodes of confirmed pCAP managed in  
57  
58 the community, post hoc analysis of a subgroup of cases reported by GPs network was performed. This  
59

1  
2  
3 analysis was performed according to a 1:3 matched case-control design. For every enrolled patient, a list of  
4 potential asymptomatic controls was generated from GPs subjects' medical records. Three controls, matched  
5 by GP, age, and gender, were selected at random for each case. Controls were enrolled if they provided  
6 written informed consent to their GP. Study personnel contacted these GPs to obtain a medical and  
7 vaccination history for every control. Immunization information system was also used to verify vaccination  
8 histories.  
9  
10  
11  
12  
13  
14

## 15 **Statistical Analysis**

16  
17  
18 Statistical analyses were performed in STATA (version 14; StataCorp, College Station, TX, USA).

19  
20  
21 Chi-square analysis or Fisher's exact test, 2-sided, were used to calculate the p-value for the difference  
22 between study groups in percentages of subjects reporting a pCAP or non pneumococcal pneumonia.  
23

24  
25 Exact logistic regression was used to calculate the unadjusted odds ratios (ORs) of vaccination together with  
26 95% confidence intervals (95% CI). In the post hoc subgroup analysis, the matched ORs for vaccination in  
27 cases and controls were calculated using conditional logistic regression, controlling for the presence of  
28 underlying conditions. Vaccine effectiveness was calculated as one minus the OR times 100%.  
29  
30  
31  
32  
33  
34

## 35 **RESULTS**

36  
37  
38 From the 1,867 eligible adults identified over the two-year period, 226 consented to the study. Main reasons  
39 why patients (or a relative) declined to participate were old age, difficulty in reading and/or understanding  
40 the invite letter, acute confusion or cognitive impairment, or a desire not to have medication altered. Of 226  
41 patients recruited, 176 (77.9%) were admitted to Departments of Respiratory Medicine and 50 (22.1%) were  
42 registered with a GP. Pneumonia severity was low, moderate and high in 47 (20.8%), 167 (73.9%) and 12  
43 (5.3%) adults, respectively. Forty patients were excluded as they were unable to provide a blood or a  
44 sputum/BAL sample, leaving 186 in the cohort for analyses. The median age of the cohort was 79 years  
45 (interquartile range, 73 to 85) and 65 (34.9%) were female. Twenty (10.8%) had received PCV13 and 60  
46 (32.3%) had received PPSV23 <5 years prior to enrolment (Table 1). The seasonal distribution of CAP cases  
47  
48  
49  
50  
51  
52  
53  
54  
55  
56  
57  
58  
59  
60

followed a pattern similar to that of many other respiratory diseases, with similar peaks during the winter months of the two-year period (Figure 1).

**Table 1. Characteristics of adults with community-acquired pneumonia requiring hospitalization or managed in the community**

|                                                                         | Pneumococcal group<br>(N = 59) | Non-pneumococcal group<br>(N = 127) | CAP cohort<br>(N = 186) |
|-------------------------------------------------------------------------|--------------------------------|-------------------------------------|-------------------------|
| <b>Demographics</b>                                                     |                                |                                     |                         |
| Age years                                                               | 79 (71 to 83)                  | 79 (73 to 85)                       | 79 (73 to 85)           |
| Male                                                                    | 42 (71.2)                      | 79 (62.2)                           | 121 (65.1)              |
| <b>Reporting</b>                                                        |                                |                                     |                         |
| Hospital physicians                                                     | 38 (64.4)                      | 105 (82.7)                          | 143 (76.9)              |
| GPs                                                                     | 21 (35.6)                      | 22 (17.3)                           | 43 (23.1)               |
| <b>Any underlying comorbidity*</b>                                      |                                |                                     |                         |
| Chronic heart disease                                                   | 28 (47.5)                      | 70 (55.1)                           | 98 (52.7)               |
| Chronic respiratory disease                                             | 29 (49.2)                      | 52 (40.9)                           | 81 (43.6)               |
| Diabetes                                                                | 14 (23.7)                      | 32 (25.2)                           | 46 (24.7)               |
| Chronic kidney disease                                                  | 2 (3.4)                        | 9 (7.1)                             | 11 (5.9)                |
| Chronic liver disease                                                   | 2 (3.4)                        | 3 (2.4)                             | 5 (2.6)                 |
| Malignancy                                                              | 0                              | 4 (3.1)                             | 4 (2.1)                 |
| Asplenia                                                                | 1 (1.7)                        | 1 (0.8)                             | 2 (1.1)                 |
| <b>Status regarding receipt of pneumococcal vaccination<sup>†</sup></b> |                                |                                     |                         |
| PCV13                                                                   | 5 (8.5)                        | 15 (11.8)                           | 20 (10.8)               |
| PPSV23 given <5 years prior to study enrolment                          | 20 (33.9)                      | 40 (31.5)                           | 60 (32.3)               |
| <b>Outcomes<sup>§</sup></b>                                             |                                |                                     |                         |
| 30-day mortality                                                        | 2 (3.4)                        | 2 (1.6)                             | 4 (2.2)                 |
| Recovery with <i>sequelae</i>                                           | 5 (8.5)                        | 20 (15.7)                           | 25 (13.4)               |

Data are number, median (interquartile range) or number (%). \*The groups were not mutually exclusive and therefore do not sum to 100%. <sup>†</sup>For both vaccines, patients were considered to be vaccinated if they had received the vaccine at least 2 weeks before enrolment. Data were missing for four patients in the non-pneumococcal group. One patient had received a dose of PCV13  $\geq 1$  year after receipt of a PPSV23 dose given <5 years prior to study enrolment. <sup>§</sup>Data were missing for 20 patients in the pneumococcal group and 40 patients in the non-pneumococcal group.

A nasopharyngeal swab was obtained from 171 of the 186 (91.9%) participants, a blood sample from 152 (81.7%), a sputum specimen from 139 (74.7%), and a BAL specimen from 3 (1.6%). *S. pneumoniae* was detected in 71 (41.5%) nasopharyngeal swab, 2 (1.3%) blood, 55 (39.6%) sputum, and 2 (66.7%) BAL.

Of 186 in the CAP cohort, 59 (31.7%, 95% CI 25.7 to 38.9%) adults were identified as pneumococcal CAP. More than half (31, 52.5%) had disease caused by one of the PCV7 serotypes, of which 23F, 9V, 14, 4 and 19F were the most common; 8 (13.6%) had CAP due to additional PCV13 serotypes, of which 19A and 3 were the most common; 9 (15.2%) had CAP due to serotypes only contained in PPSV23; 4 (6.8%) had non-vaccine-type disease; 7 (11.9%) had nontypeable pneumococcal CAP (Figure 1). Five had received one dose

of PCV13 and 20 one dose of PPSV23 <5 years prior to enrolment. Of 39 patients infected with serotypes contained in PCV13, three had received this vaccine (disease caused by 9V in two cases and 23F in one) (Figure 2).

Baseline characteristics and outcomes were balanced between pneumococcal and non-pneumococcal groups (Table 1).

## Vaccines Effectiveness

PCV13 VE estimate was 33.2% (95% CI -106.6% to 82%) against pneumococcal CAP irrespective of serotype and 38.1% (95% CI -131.9% to 89%) against vaccine-type CAP in the cohort of adults  $\geq 65$  years. The VE was 42.3% (95% CI -244.1% to 94.7%) with respect to VT-CAP in the age group at higher vaccine uptake (65-75 years).

The VE was 34.6% (95% CI -104.6% to 82.5%) against CAP due to any pneumococcal strain and 40.1% (95% CI -127.5% to 89.4%) against CAP due to vaccine-type strains for adults with underlying conditions.

PCV13 VE against the two primary end points in patients naïve to PPSV23 or vaccinated with PPSV23  $\geq 5$  years prior to enrolment was 27.35% (95% CI -136.5% to 81.5%) and 17% (95% CI -234.7% to 85.9%) respectively, lower than VE estimates in subgroups defined irrespective of PPSV23 immune status (Table 2).

**Table 2. PCV13 effectiveness estimates against all episodes of confirmed pneumococcal CAP and CAP due to vaccine serotypes in adults by vaccination status and the presence of underlying conditions**

|                                                                                                          | Cases<br>vaccinated/<br>unvaccinated | Controls<br>vaccinated/<br>unvaccinated <sup>§</sup> | Vaccine<br>effectiveness | 95% CI           |
|----------------------------------------------------------------------------------------------------------|--------------------------------------|------------------------------------------------------|--------------------------|------------------|
| Pneumococcal CAP (any strain)                                                                            | 5/54                                 | 15/108*                                              | 33.2%                    | -106.6% to 82%   |
| Vaccine-type CAP                                                                                         | 3/36                                 | 17/126 <sup>†</sup>                                  | 38.1%                    | -131.9% to 89%   |
| Vaccine-type CAP in the age group at higher vaccine uptake (65-75 years)                                 | 2/14                                 | 8/32 <sup>†</sup>                                    | 42.3%                    | -244.1% to 94.7% |
| Pneumococcal CAP in patients with $\geq 1$ comorbid disorder                                             | 5/46                                 | 15/90*                                               | 34.6%                    | -104.6% to 82.5% |
| Vaccine-type CAP in patients with $\geq 1$ comorbid disorder                                             | 3/31                                 | 17/105 <sup>†</sup>                                  | 40.1%                    | -127.5% to 89.4% |
| Pneumococcal CAP in patients naïve to PPSV23 or vaccinated with PPSV23 $\geq 5$ years prior to enrolment | 5/34                                 | 14/69*                                               | 27.3%                    | -136.5% to 81.5% |
| Vaccine-type CAP in patients naïve to PPSV23 or vaccinated with PPSV23 $\geq 5$ years prior to enrolment | 3/19                                 | 16/84 <sup>†</sup>                                   | 17%                      | -234.7% to 85.9% |

\*Controls were patients with an episode of non pneumococcal pneumonia. <sup>†</sup>Controls were patients with NVT pneumococcal CAP, non-typable isolates or non pneumococcal pneumonia. <sup>§</sup>Vaccine data were missing for four controls.



PPSV23 was not shown to have effectiveness against pneumococcal CAP in either all adults (VE -4%, 95% CI -115.4% to 50.4%) or those with comorbidities (VE -5.5%, 95 %CI: -130.5% to 52.2%) naïve to PCV13.

Post hoc subgroup analysis of 21 confirmed cases reported by GPs network (Table 1) provided estimates of PCV13 effectiveness in preventing pneumococcal CAP managed in the community.

We identified 4,965 asymptomatic adults as potential controls, of whom 129 (2.6%) died and 95 (1.9%) were excluded because they left the GP's practice during the study period. Among the remaining 4,741 controls, 63 (three per case) were selected for the analysis. Nine (14.2%) controls were replaced for difficulty in obtaining consent.

Review of GP records showed that the controls were of similar age and gender to cases, but differed in vaccination and clinical history: one case (4.8%) and one control (1.6%) had received PCV13 at least 2 weeks before enrolment, whereas 18 controls (28.6%) were vaccinated during the study period; 16 cases (76.2%) and 36 controls (57.1%) had at least one comorbid disorder.

The overall effectiveness of PCV13 against disease due to any pneumococcal strain was 88.1% (95% CI 4.2% to 98.5%) and 91.7% (95% CI 13.1% to 99.2%) when we controlled for underlying conditions (Figure 3).

## DISCUSSION

To our knowledge, this is the first study to investigate the effectiveness of PCV13 for prevention of invasive and non-invasive pneumococcal pneumonia among adults  $\geq 65$  years. The overall VE was 33.2% against pCAP irrespective of serotype and 38.1% against VT-CAP. The VE was 42.3% against VT-CAP in the age group at higher vaccine uptake. Moreover, we estimated a vaccine effectiveness of 88.1% against confirmed pneumococcal CAP managed in the community, where most patients are treated as outpatients. Given that a substantial proportion of studies are based on hospitalised patients, the true burden of disease is not known in Europe, where only Finland, Spain and the UK have precise epidemiological data on CAP.[18-19]

1  
2  
3 In this study, PCV13 serotypes accounted for 66% of all confirmed pneumococcal CAP. National Invasive  
4 Bacterial Diseases surveillance data from Italy showed that, despite an uncertain reduction in the proportion  
5 of PCV13 serotypes in the period 2010–2012, these were still responsible for about 56% of cases among  
6 over-65s.[20] These data suggest that PCV13 vaccine-type pneumococcal disease continues to have a high  
7 burden in adults in Italy despite childhood PCV13 vaccination and would indicate a lack of herd protection  
8 effects in older age groups, in comparison to the vaccinated paediatric population.[8, 20-21] The most recent  
9 data in the UK suggest that, despite an ongoing trend of reduced incidence of PCV13 serotype CAP from  
10 paediatric conjugate vaccines,[5, 22] PCV13 serotypes currently account for 12.6% of all cases of CAP and  
11 41% of pneumococcal CAP in adults.[18] In Ireland, in over 5 years following PCV13 introduction to  
12 routine childhood vaccination, the number of IPD associated with additional PCV13 serotypes in adults  $\geq 65$   
13 years of age has remained relatively unchanged due to the persistence in serotypes 3 and 19A in this age-  
14 group.[23] In Spain, 13 years after introduction of PCV7/PCV13 for children, a significant proportion of  
15 adults continue to develop vaccine serotype CAP, suggesting an insufficient indirect protection. [24]  
16 Because it cannot be assumed that a decline in pneumococcal disease incidence observed in some countries  
17 will always be mirrored elsewhere in the same time, adults aged  $\geq 65$  years may have a great potential for  
18 disease reduction from PCV13 and may be a primary target of vaccination programmes.[9] This is  
19 particularly noteworthy for Italian population because the burden of CAP and pneumococcal disease in  
20 general is expected to increase with the aging society, even with the impact of childhood and adult vaccine  
21 programmes.[18, 25]

22  
23  
24  
25  
26  
27  
28  
29  
30  
31  
32  
33  
34  
35  
36  
37  
38  
39  
40  
41 In our study, most of CAP was caused by PCV13 serotypes 23F, 9V, 14, 19A, 4, 19F, and 3 (Figure 2) that  
42 are among the less susceptible to antibiotics.[26] Recent findings for Switzerland showed that, while non-  
43 susceptible serotypes 19A, 9V, 6B, 23F and 14 among invasive and non-invasive *S. pneumoniae* decreased  
44 over time in patients up to age 64 years vaccination due to PCVs infant vaccination,[27-29] in patients older  
45 than 64 years with invasive *S. pneumoniae* resistance rates remained unchanged.[30] By preventing disease  
46 caused by resistant strains, adult PCV13 vaccination provides a robust strategy for combating antimicrobial  
47 resistance that is a growing problem in Europe.[31]

1  
2  
3 On January 19, 2017, PCV13 has been introduced into the routine vaccination schedule in Italy for all adults  
4 65 years of age followed by a dose of PPV23.[32] The decision-making regarding its introduction was based  
5 on the CAPITA trial results and the ACIP recommendations, but also on a long history of experience of adult  
6 pneumococcal conjugate vaccination in some Italian regions including Apulia.[7, 12]  
7  
8  
9

10  
11 In this prospective cohort study of adults with CAP we found that PCV13 promise to be protective against all  
12 episodes of confirmed pneumococcal CAP (VE 33.2%) and against disease caused by serotypes contained in  
13 the vaccine (VE 38.1%). Recently published findings of the exploratory efficacy endpoint analysis of the  
14 CAPITA trial showed VE of 29% for all episodes of confirmed pneumococcal CAP and 43% for all non-  
15 bacteremic and noninvasive episodes of VT pneumococcal CAP,[33] findings consistent with the primary  
16 efficacy analysis.[9] On an ecological level, a preliminary analysis of hospitalization rates for adult  
17 pneumococcal CAP in Apulia region showed early PCV13 impact after the implementation of an adult  
18 vaccine programme (from 180,5 per 100,000 during 2006-2011 to 162,4 per 100,000 during 2012-2016;  
19 hospitalization risk ratio: 0,9 95% CI 0.83 to 0.97). [unpublished observations]  
20  
21  
22  
23  
24  
25  
26  
27  
28  
29

30 Moreover, our results showed that PCV13 promise to be effective for prevention of vaccine-type CAP  
31 already with modest levels of uptake in the target population (VE 42.3%). These data would suggest that  
32 rapid uptake and improved coverage of PCV13 among adults in the short term could maximize its  
33 impact.[11, 34]  
34  
35  
36  
37  
38

39 The incidence of pneumococcal CAP is greatly increased in many individual clinical risk groups.[35] Since  
40 when the ACIP recommended PCV13 for immunocompromised adults in 2012, there remains little evidence  
41 regarding the efficacy of the vaccine in at risk populations.[36, 9, 37] Our findings would suggest that  
42 vaccination with PCV13 may be effective in preventing pneumococcal disease in adults  $\geq 65$  years with  
43 comorbid disorders. This observation, taken together with no effectiveness showed by PPV23 in our cohort,  
44 will require further studies to verify how adults with chronic diseases may fully benefit of the ACIP and the  
45 new Italian recommendations for the use of both PCV13 and PPSV23 in series. A recent systematic review  
46 and meta-analysis designed to estimate the efficacy of PPV23 in the prevention of pCAP, particularly in  
47 patients above 60 years of age and adults with underlying diseases, showed that PPV23 vaccination “alone”  
48  
49  
50  
51  
52  
53  
54  
55  
56  
57  
58  
59  
60

1  
2  
3 does not demonstrate clear efficacy, supporting the administration of a dose of PCV13 first followed by a  
4 dose of PPV23 at least 8 weeks later.[38]

5  
6  
7 Another recent systematic review of the burden of vaccine preventable pneumococcal disease in UK adults  
8 did not identify studies that were conducted in the community, where the majority of pCAP is managed.[18]  
9  
10 In our study, as it was designed to capture both invasive and non-invasive pneumococcal CAP,  
11 approximately 36% of cases had been reported by general practitioners, suggesting that hospital based  
12 studies may underestimate the true impact of pneumococcal disease. Post hoc subgroup analysis of cases  
13 managed in the community provided estimates of PCV13 effectiveness with respect to CAP from any  
14 pneumococcal serotype and this value did not change when we controlled for the presence of underlying  
15 disorders.  
16  
17  
18  
19  
20  
21  
22

23 This study has several limitations. First, it was performed in a single region with a long-lasting history of  
24 experience of adult pneumococcal conjugate vaccination. Therefore, data from our setting may not be  
25 representative of the entire Italian adult population or generalizable to other settings. Moreover, data  
26 regarding the epidemiology of pCAP in adults in Italy are very limited and a large variability among  
27 published studies exists.[20]  
28  
29  
30  
31  
32

33  
34 Second, the recruitment rate was very low affecting the representativeness of the sample; however, there was  
35 not a risk for selection bias since both cases and controls were recruited in one process and arose from the  
36 whole population when the same enrolment criteria were met.  
37  
38  
39

40 Third, 40 out of 226 enrolled patients were unable to provide a blood or a sputum/BAL sample, which could  
41 have led to underestimation or overestimation of pneumococcal aetiology rates. Owing to ethical and  
42 feasibility considerations, specimens were obtained only for clinical care and no invasive procedures were  
43 performed for this study, which may have reduced the microbiologic yield. However, 82% of the adults had  
44 at least one specimen type available for *S. pneumoniae* detection.  
45  
46  
47  
48  
49

50 The study size was small reducing the power to detect statistically significant effects, although  
51 pneumococcal aetiology was identified in 31.7% CAP adults. Recent corresponding figure from Rodrigo et  
52 al. for UK was 29.3%.[5] The main limitation, however, pertains to the small numbers of PCV13 vaccinated  
53 cases and controls underlying the estimation of the vaccine effectiveness accounting for wide 95% CIs  
54  
55  
56  
57  
58  
59

1  
2  
3 including zero. Although VE estimates should be interpreted with caution, our calculation reflected the still  
4 low PCV13 coverage achieved in the vaccinated cohorts. It was, therefore, too early to narrow the  
5 confidence limits around the point-estimate of effectiveness.  
6  
7

8  
9 Fourth, the test-negative method may overestimate VE if, by reducing the risk of acquiring VT serotypes,  
10 vaccination increases the risk of acquiring NVT as is likely to be the case if there is serotype replacement.  
11  
12

13 Fifth, we were not able to assess the effectiveness of individual vaccine serotypes, as there were too few  
14 cases to allow statistical comparison between study groups.  
15  
16

17  
18 Nonetheless, our study pointed out important gaps regarding the burden of pneumococcal CAP in Italy  
19 where there are limited data outside of national surveillance of IPD and the only available data for non-  
20 invasive disease are limited to hospitalization for pneumococcal pneumonia that, however, lack of serotyping  
21 information.[20] The active surveillance of adult confirmed CAP, drawn from a relative stable population  
22 over a two-year period, was a strength of our study and allowed us to estimate the effectiveness of the 13-  
23 valent pneumococcal conjugate vaccine against all confirmed CAP, without regard to serotype, the presence  
24 of underlying conditions, and the site of patient management (hospital/community).  
25  
26  
27  
28  
29  
30  
31

32 This study has clinical practice implications for pneumococcal vaccination policies in adults in countries  
33 where PCV13 is becoming part of routine immunization of the elderly. Although our results are non-  
34 significant, they can stimulate to perform larger studies that would probably confirm the vaccine  
35 effectiveness but probably with narrower confidence intervals than those presented here.  
36  
37  
38  
39  
40  
41  
42  
43  
44  
45  
46  
47  
48  
49  
50  
51  
52  
53  
54  
55  
56  
57  
58  
59  
60

## ACKNOWLEDGEMENTS

We thank the patients who consented to participate in this study; the sentinel physicians for their contributions to the enrolment of patients and collection of data (Maria Aliani, Mario Bisconti, Donato Vincenzo Catamerò, Vittoria Rosaria Costa, Elio Costantino, Gaetano D'Ambrosio, Francesco Dadduzio, Antonio De Maria, Mario Domenico Dell'Orco, Mario Lucio Dell'Orco, Pier Luigi Di Napoli, Oronzo Filieri, Maria Pia Foschino Barbaro, Vincenzo Frappampina, Donato Lacedonia, Giuseppe Vincenzo Laera, Luciana Labate, Paolo Lombardi, Michele Maiellari, Orazio Lippolis, Francesco Mariani, Antonio Metrucci, Gabriele Miolli, Onofrio Resta, Luigi Santoiemma, Teresa Scarabaggio, Salvatore Talamo); Anna Lisa De Robertis for her valuable laboratory work.

## COMPETING INTERESTS

We have read and understood BMJ policy on declaration of interests and declare the following interests: RP reports grants from Pfizer, during the conduct of the study; grants, personal fees and non-financial support from Pfizer, personal fees and non-financial support from SanofiPasteurMSD, personal fees and non-financial support from GSK, outside the submitted work. DM reports grants and non-financial support from GSK, non-financial support from SanofiPasteurMSD, non-financial support from Pfizer, outside the submitted work. FF, MGC and MC declare that they have no competing interests.

## SUPPORT STATEMENT

This work was in part supported by Pfizer unrestricted Investigator-Initiated Research Grant IRR WS 2164183.

## CONTRIBUTORS

RP and DM conceptualised and designed the work, analysed and interpreted data, and writing the manuscript. FF and MGC contributed to the data collection, managed the database and provided statistical support. MC performed the laboratory work. All authors have read and approved the final manuscript.

1  
2  
3  
4  
5  
6  
7  
8  
9  
10  
11  
12  
13  
14  
15  
16  
17  
18  
19  
20  
21  
22  
23  
24  
25  
26  
27  
28  
29  
30  
31  
32  
33  
34  
35  
36  
37  
38  
39  
40  
41  
42  
43  
44  
45  
46  
47  
48  
49  
50  
51  
52  
53  
54  
55  
56  
57  
58  
59  
60

## DATA SHARING STATEMENT

There are no unpublished data available.

For peer review only

## REFERENCES

1. Weil-Olivier C, Gaillat J. Can the success of pneumococcal conjugate vaccines for the prevention of pneumococcal diseases in children be extrapolated to adults? *Vaccine* 2014;32(18):2022-6. doi: 10.1016/j.vaccine.2014.02.008.
2. Griffin MR, Zhu Y, Moore MR, et al. U.S. hospitalizations for pneumonia after a decade of pneumococcal vaccination. *N Engl J Med* 2013;369(2):155-63. doi: 10.1056/NEJMoa1209165.
3. Jain S, Self WH, Wunderink RG, et al. Community-Acquired Pneumonia Requiring Hospitalization among U.S. Adults. *N Engl J Med* 2015;373(5):415-27. doi: 10.1056/NEJMoa1500245.
4. Tomczyk S, Bennett NM, Stoecker C, et al. Use of 13-valent pneumococcal conjugate vaccine and 23-valent pneumococcal polysaccharide vaccine among adults aged  $\geq 65$  years: recommendations of the Advisory Committee on Immunization Practices (ACIP). *MMWR Morb Mortal Wkly Rep* 2014;63(37):822-5.
5. Rodrigo C, Bewick T, Sheppard C, et al. Impact of infant 13-valent pneumococcal conjugate vaccine on serotypes in adult pneumonia. *Eur Respir J* 2015;45:1632-41. doi: 10.1183/09031936.00183614.
6. Centro nazionale per la prevenzione delle malattie e la promozione della salute, Istituto superiore di sanità. Copertura vaccinale in Italia. Le vaccinazioni in Italia. 2016. Italy. Available from: [http://www.epicentro.iss.it/temi/vaccinazioni/dati\\_Ita.asp](http://www.epicentro.iss.it/temi/vaccinazioni/dati_Ita.asp) (Accessed August 4, 2017).
7. Castiglia P. Recommendations for pneumococcal immunization outside routine childhood immunization programs in Western Europe. *Adv Ther* 2014;31(10):1011-44. doi: 10.1007/s12325-014-0157-1.
8. Prato R, Fortunato F, Martinelli D. Pneumococcal pneumonia prevention among adults: is the herd effect of pneumococcal conjugate vaccination in children as good a way as the active immunization of the elderly? *Curr Med Res Opin* 2016;32(3):543-5. doi: 10.1185/03007995.2015.1131150.
9. Bonten MJ, Huijts SM, Bolkenbaas M, et al. Polysaccharide conjugate vaccine against pneumococcal pneumonia in adults. *N Engl J Med* 2015;372:1114-25. doi: 10.1056/NEJMoa1408544.
10. Kobayashi M, Bennett NM, Gierke R, et al. Intervals Between PCV13 and PPSV23 Vaccines: Recommendations of the Advisory Committee on Immunization Practices (ACIP). *MMWR Morb Mortal Wkly Rep* 2015;64(34):944-7. doi: 10.15585/mmwr.mm6434a4.



- 1  
2  
3 11. Pilishvili T, Bennett NM. Pneumococcal disease prevention among adults: strategies for the use of  
4 pneumococcal vaccines. *Vaccine* 2015;33 Suppl 4:D60-5. doi: 10.1016/j.vaccine.2015.05.102.
- 5  
6  
7 12. Deliberazione della Giunta Regionale 20 maggio 2014, n. 95. Commissione Regionale Vaccini.  
8 Modifica Calendario Regionale per la vita 2012 - DGR 241/2013. Approvazione nuovo Calendario  
9 Vaccinale per la vita 2014. Bollettino Ufficiale della Regione Puglia n. 74 of 11/06/2014. 2014. Italy.  
10 Available from: [http://beta.regione.puglia.it/documents/10180/4782589/N74\\_11\\_06\\_14.pdf](http://beta.regione.puglia.it/documents/10180/4782589/N74_11_06_14.pdf) (Accessed  
11 August 4, 2017).
- 12  
13  
14  
15  
16 13. Osservatorio Epidemiologico della regione Puglia. Bollettino delle Coperture Vaccinali - Resoconto sul  
17 monitoraggio delle attività vaccinali regionali condotte negli anni 2007-2015. 2016. Italy. Available  
18 from: <https://www.sanita.puglia.it/documents/36126/269121/Bollettino+delle+Coperture+Vaccinali+-+Anni+2007+-+2015/f078c7d1-a19c-40de-8246-a2ae36278024?version=1.0&t=1491399965137>  
19  
20  
21  
22  
23  
24 (Accessed August 4, 2017).
- 25  
26 14. Istituto Nazionale di Statistica. Popolazione Residente per età, sesso e stato civile al 1° gennaio 2015.  
27 2015. <http://www.demoistat.it>. (Accessed August 4, 2017).
- 28  
29  
30 15. Chow AW, Hall CB, Klein JO, et al. Evaluation of new anti-infective drugs for the treatment of  
31 respiratory tract infections. Infectious Diseases Society of America and the Food and Drug  
32 Administration. *Clin Infect Dis* 1992;15(Suppl 1):S62-88.
- 33  
34  
35 16. Pai R, Gertz RE, Beall B. Sequential multiplex PCR approach for determining capsular serotypes of  
36  
37  
38  
39  
40  
41  
42  
43  
44  
45  
46  
47  
48  
49  
50  
51  
52  
53  
54  
55  
56  
57  
58  
59  
60 17. Mavroidi A, Godoy D, Aanensen DM, et al. Evolutionary genetics of the capsular locus of serogroup 6  
pneumococci. *J Bacteriol* 2004;186:8181-92. doi: <http://dx.doi.org/10.1128/JB.186.24.8181-8192.2004>.
18. Chalmers JD, Campling J, Dicker A, et al. A systematic review of the burden of vaccine preventable  
pneumococcal disease in UK adults. *BMC Pulm Med* 2016;16(1):77. doi: 10.1186/s12890-016-0242-0.
19. Welte T, Torres A, Nathwani D. Clinical and economic burden of community-acquired pneumonia  
among adults in Europe. *Thorax* 2012;67(1):71-9. doi: 10.1136/thx.2009.129502.
20. Rota MC, Bella A, D'Ancona F, et al. Vaccini anti-pneumococcici: dati ed evidenze per l'utilizzo nei  
soggetti a rischio di qualsiasi età e per l'eventuale ampliamento dell'offerta ai soggetti anziani (dicembre

- 2013). 2015. Roma: Istituto Superiore di Sanità. Rapporti ISTISAN 15/13. Available from: [http://www.iss.it/binary/publ/cont/15\\_13.pdf](http://www.iss.it/binary/publ/cont/15_13.pdf) (Accessed August 4, 2017).
21. Fortunato F, Martinelli D, Cappelli MG, et al. Impact of pneumococcal conjugate universal routine vaccination on pneumococcal disease in Italian children. *J Immunol Res* 2015;2015:206757. doi: <http://dx.doi.org/10.1155/2015/206757>.
22. Waight PA, Andrews NJ, Ladhani SN, et al. Effect of the 13-valent pneumococcal conjugate vaccine on invasive pneumococcal disease in England and Wales 4 years after its introduction: an observational cohort study. *Lancet Infect Dis* 2015;15(5):535–43. doi: [http://dx.doi.org/10.1016/S1473-3099\(15\)70044-7](http://dx.doi.org/10.1016/S1473-3099(15)70044-7).
23. Corcoran M, Vickers I, Mereckiene J, et al. The epidemiology of invasive pneumococcal disease in older adults in the post-PCV era. Has there been a herd effect? *Epidemiol Infect* 2017;145(11):2390-2399. doi: 10.1017/S0950268817001194.
24. Menéndez R, España PP, Pérez-Trallero E, et al. The burden of PCV13 serotypes in hospitalized pneumococcal pneumonia in Spain using a novel urinary antigen detection test. CAPA study. *Vaccine* 2017 ;35(39):5264-5270. doi: 10.1016/j.vaccine.2017.08.007.
25. Institute for Health Metrics and Evaluation (IHME). Life Expectancy & Probability of Death. Seattle, WA: IHME, University of Washington. 2017. Available from: <http://vizhub.healthdata.org/le/> (Accessed August 4, 2017).
26. Song JH, Dagan R, Klugman KP, Fritzell B. The relationship between pneumococcal serotypes and antibiotic resistance. *Vaccine* 2012;30(17):2728-37. doi: 10.1016/j.vaccine.2012.01.091.
27. Hauser C, Kronenberg A, Allemann A, et al. Serotype/serogroup-specific antibiotic non-susceptibility of invasive and non-invasive *Streptococcus pneumoniae*, Switzerland, 2004 to 2014. *Euro Surveill* 2016;21(21):pii=30239. doi: <http://dx.doi.org/10.2807/1560-7917.ES.2016.21.21.30239>.
28. Kyaw MH, Lynfield R, Schaffner W, et al. Effect of introduction of the pneumococcal conjugate vaccine on drug-resistant *Streptococcus pneumoniae*. *N Engl J Med* 2006;354(14):1455-63. doi: 10.1056/NEJMoa051642.

- 1  
2  
3 29. Dagan R, Juergens C, Trammel J, et al. Efficacy of 13-valent pneumococcal conjugate vaccine (PCV13)  
4 versus that of 7-valent PCV (PCV7) against nasopharyngeal colonization of antibiotic nonsusceptible  
5 *Streptococcus pneumoniae*. *J Infect Dis* 2015;211(7):1144-53. doi: 10.1093/infdis/jiu576.  
6  
7  
8  
9 30. Meichtry J, Born R, Küffer M, et al. Serotype epidemiology of invasive pneumococcal disease in Swiss  
10 adults: a nationwide population-based study. *Vaccine* 2014;32(40):5185-91. doi:  
11 10.1016/j.vaccine.2014.07.060.  
12  
13  
14 31. European Centre for Disease Prevention and Control. Antimicrobial resistance surveillance in Europe  
15 2015. Annual Report of the European Antimicrobial Resistance Surveillance Network (EARS-Net).  
16 Stockholm: ECDC. 2017. Available from:  
17 <http://ecdc.europa.eu/en/publications/Publications/antimicrobial-resistance-europe-2015.pdf> (Accessed  
18 August 4, 2017).  
19  
20  
21  
22  
23  
24 32. Intesa, ai sensi dell'articolo 8, comma 6, della legge 5 giugno 2003, n. 131, tra il Governo, le regioni e le  
25 province autonome di Trento e Bolzano sul documento recante «Piano nazionale prevenzione vaccinale  
26 2017-2019», GU Serie Generale n. 41 del 18-2-2017. 2017. Italy. Available from:  
27 <http://www.trovanorme.salute.gov.it/norme/dettaglioAtto?id=58185&completo=true> (Accessed August  
28 4, 2017).  
29  
30  
31  
32  
33  
34 33. Webber C, Patton M, Patterson S, et al. Exploratory efficacy endpoints in the Community-Acquired  
35 Pneumonia Immunization Trial in Adults (CAPiTA). *Vaccine* 2017;35(9):1266-1272. doi:  
36 10.1016/j.vaccine.2017.01.032.  
37  
38  
39  
40 34. Mendes RE, Hollingsworth RC, Costello A, et al. Noninvasive *Streptococcus pneumoniae* serotypes  
41 recovered from hospitalized adult patients in the United States in 2009 to 2012. *Antimicrob Agents*  
42 *Chemother* 2015;59:5595-601. doi: 10.1128/AAC.00182-15  
43  
44  
45  
46 35. Torres A, Blasi F, Dartois N, Akova M. Which individuals are at increased risk of pneumococcal disease  
47 and why? Impact of COPD, asthma, smoking, diabetes, and/or chronic heart disease on community-  
48 acquired pneumonia and invasive pneumococcal disease. *Thorax* 2015;70:984-9. doi: 10.1136/thoraxjnl-  
49 2015-206780  
50  
51  
52  
53  
54 36. Joint Committee on Vaccination and Immunisation, Department of Health, UK. Interim JCVI statement  
55 on adult pneumococcal vaccination in the UK - November 2015. 2015. UK. Available from:  
56  
57  
58  
59  
60

1  
2  
3 [https://www.gov.uk/government/uploads/system/uploads/attachment\\_data/file/477966/JCVI\\_pnemococe](https://www.gov.uk/government/uploads/system/uploads/attachment_data/file/477966/JCVI_pnemococe)  
4 [al.pdf](#) (Accessed August 4, 2017).

- 5  
6  
7 37. Baldo V, Cocchio S, Gallo T, et al. Pneumococcal Conjugated Vaccine Reduces the High Mortality for  
8 Community-Acquired Pneumonia in the Elderly: an Italian Regional Experience. *PLoS ONE* 2016.  
9 11(11):e0166637. doi: 10.1371/journal.pone.016663.  
10  
11  
12 38. Schiffner-Rohe J, Witt A, Hemmerling J, et al. Efficacy of PPV23 in Preventing Pneumococcal  
13 Pneumonia in Adults at Increased Risk. A Systematic Review and Meta-Analysis. *PLoS One*  
14 2016;11(1):e0146338. doi: 10.1371/journal.pone.0146338.  
15  
16  
17  
18  
19  
20  
21  
22  
23  
24  
25  
26  
27  
28  
29  
30  
31  
32  
33  
34  
35  
36  
37  
38  
39  
40  
41  
42  
43  
44  
45  
46  
47  
48  
49  
50  
51  
52  
53  
54  
55  
56  
57  
58  
59  
60

1  
2  
3  
4 **Figure 1. Seasonal distribution of cases in the CAP cohort (N=186)**  
5

6  
7 **Figure 2. Number of cases of pneumococcal CAP by serotype and vaccination status (N=59)**  
8

9  
10  
11 **Figure 3. PCV13 effectiveness (%) estimates against CAP due to any pneumococcal strain managed in the**  
12 **community\***  
13

14 \* Fourteen cases (66.7%) had CAP caused by one of the PCV7 serotypes, of which 14 and 9V were the most common;  
15 three cases (14.3%) were due to additional PCV13 serotype 19A; three cases (14.3%) had CAP due to other serotypes;  
16 one (4.7%) had nontypeable pneumococcal CAP. One case vaccinated with PCV13 was caused by serotype 12F.  
17  
18  
19  
20  
21  
22  
23  
24  
25  
26  
27  
28  
29  
30  
31  
32  
33  
34  
35  
36  
37  
38  
39  
40  
41  
42  
43  
44  
45  
46  
47  
48  
49  
50  
51  
52  
53  
54  
55  
56  
57  
58  
59  
60

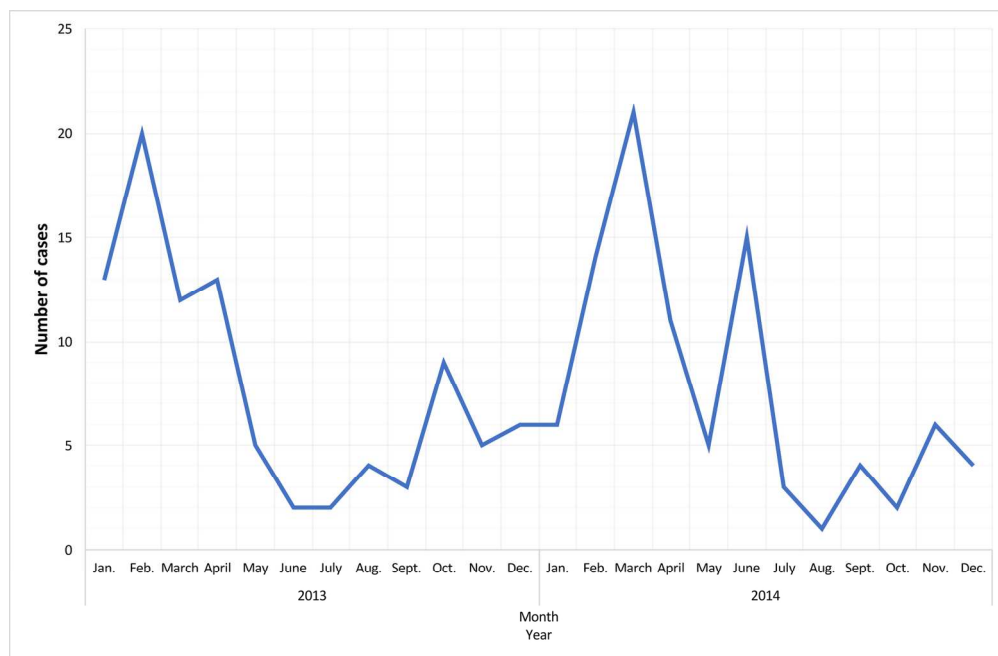

Figure 1. Seasonal distribution of cases in the CAP cohort (N=186)

169x110mm (300 x 300 DPI)

1  
2  
3  
4  
5  
6  
7  
8  
9  
10  
11  
12  
13  
14  
15  
16  
17  
18  
19  
20  
21  
22  
23  
24  
25  
26  
27  
28  
29  
30  
31  
32  
33  
34  
35  
36  
37  
38  
39  
40  
41  
42  
43  
44  
45  
46  
47  
48  
49  
50  
51  
52  
53  
54  
55  
56  
57  
58  
59  
60

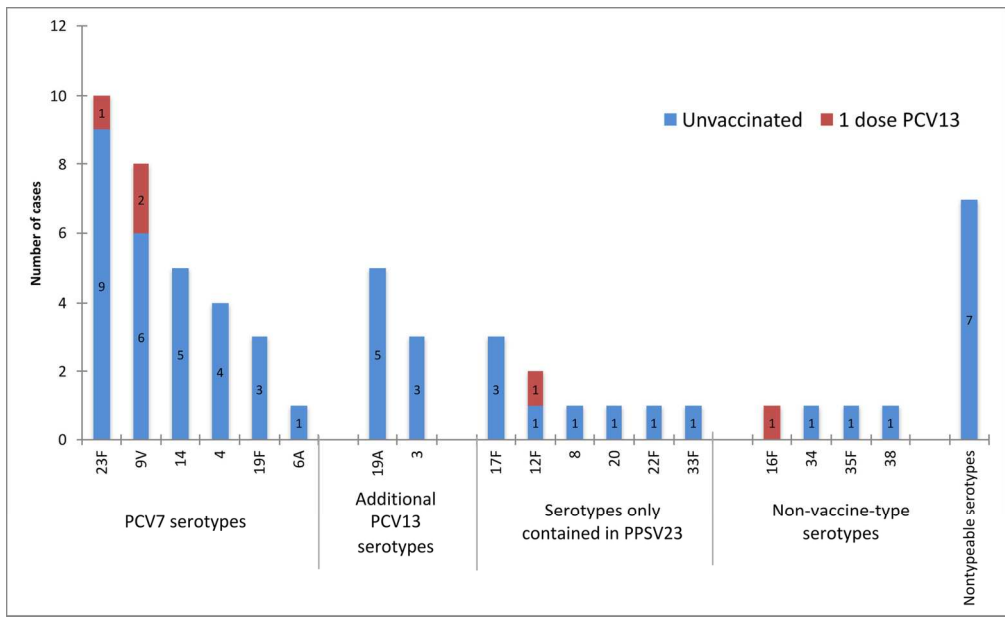

Figure 2. Number of cases of pneumococcal CAP by serotype and vaccination status (N=59)

156x95mm (300 x 300 DPI)

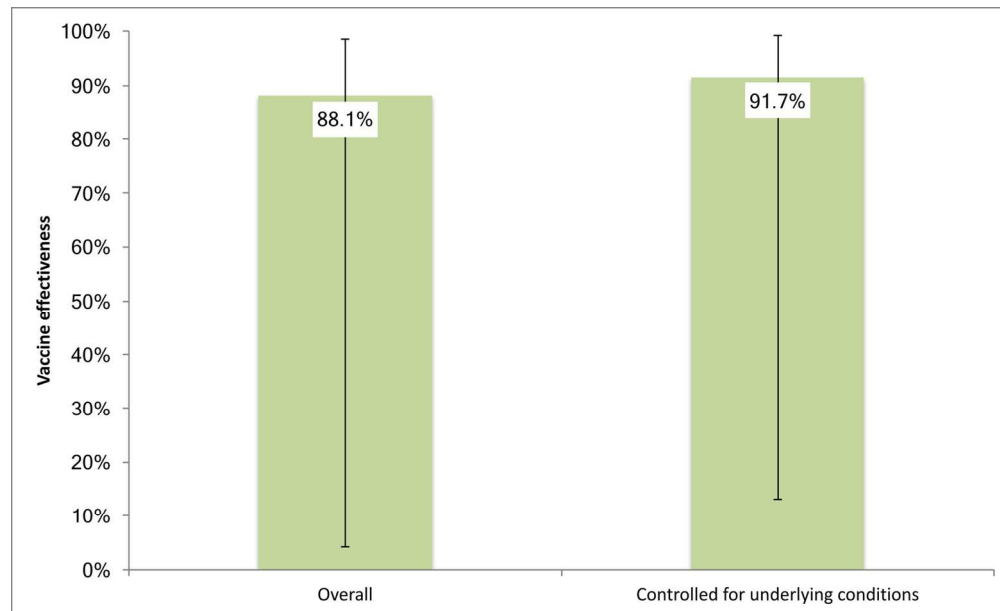

Figure 3. PCV13 effectiveness (%) estimates against CAP due to any pneumococcal strain managed in the community\*

\* Fourteen cases (66.7%) had CAP caused by one of the PCV7 serotypes, of which 14 and 9V were the most common; three cases (14.3%) were due to additional PCV13 serotype 19A; three cases (14.3%) had CAP due to other serotypes; one (4.7%) had nontypeable pneumococcal CAP. One case vaccinated with PCV13 was caused by serotype 12F.

156x95mm (300 x 300 DPI)



**STROBE 2007 (v4) Statement—Checklist of items that should be included in reports of cohort studies**

| Section/Topic             | Item # | Recommendation                                                                                                                                                                       | Reported on page # |
|---------------------------|--------|--------------------------------------------------------------------------------------------------------------------------------------------------------------------------------------|--------------------|
| Title and abstract        | 1      | (a) Indicate the study’s design with a commonly used term in the title or the abstract                                                                                               | 1                  |
|                           |        | (b) Provide in the abstract an informative and balanced summary of what was done and what was found                                                                                  | 2                  |
| <b>Introduction</b>       |        |                                                                                                                                                                                      |                    |
| Background/rationale      | 2      | Explain the scientific background and rationale for the investigation being reported                                                                                                 | 4-5                |
| Objectives                | 3      | State specific objectives, including any prespecified hypotheses                                                                                                                     | 5                  |
| <b>Methods</b>            |        |                                                                                                                                                                                      |                    |
| Study design              | 4      | Present key elements of study design early in the paper                                                                                                                              | 6                  |
| Setting                   | 5      | Describe the setting, locations, and relevant dates, including periods of recruitment, exposure, follow-up, and data collection                                                      | 6                  |
| Participants              | 6      | (a) Give the eligibility criteria, and the sources and methods of selection of participants. Describe methods of follow-up                                                           | 6                  |
|                           |        | (b) For matched studies, give matching criteria and number of exposed and unexposed                                                                                                  | 8                  |
| Variables                 | 7      | Clearly define all outcomes, exposures, predictors, potential confounders, and effect modifiers. Give diagnostic criteria, if applicable                                             | 6-8                |
| Data sources/ measurement | 8*     | For each variable of interest, give sources of data and details of methods of assessment (measurement). Describe comparability of assessment methods if there is more than one group | 6-8                |
| Bias                      | 9      | Describe any efforts to address potential sources of bias                                                                                                                            | 8-9                |
| Study size                | 10     | Explain how the study size was arrived at                                                                                                                                            | 8-9                |
| Quantitative variables    | 11     | Explain how quantitative variables were handled in the analyses. If applicable, describe which groupings were chosen and why                                                         | 8-9                |
| Statistical methods       | 12     | (a) Describe all statistical methods, including those used to control for confounding                                                                                                | 8-9                |
|                           |        | (b) Describe any methods used to examine subgroups and interactions                                                                                                                  | 8-9                |
|                           |        | (c) Explain how missing data were addressed                                                                                                                                          | 8-9                |
|                           |        | (d) If applicable, explain how loss to follow-up was addressed                                                                                                                       | 8-9                |
|                           |        | (e) Describe any sensitivity analyses                                                                                                                                                | -                  |
| <b>Results</b>            |        |                                                                                                                                                                                      |                    |

|                          |     |                                                                                                                                                                                                              |       |
|--------------------------|-----|--------------------------------------------------------------------------------------------------------------------------------------------------------------------------------------------------------------|-------|
| Participants             | 13* | (a) Report numbers of individuals at each stage of study—eg numbers potentially eligible, examined for eligibility, confirmed eligible, included in the study, completing follow-up, and analysed            | 9     |
|                          |     | (b) Give reasons for non-participation at each stage                                                                                                                                                         | 9     |
|                          |     | (c) Consider use of a flow diagram                                                                                                                                                                           | -     |
| Descriptive data         | 14* | (a) Give characteristics of study participants (eg demographic, clinical, social) and information on exposures and potential confounders                                                                     | 9     |
|                          |     | (b) Indicate number of participants with missing data for each variable of interest                                                                                                                          | 9     |
|                          |     | (c) Summarise follow-up time (eg, average and total amount)                                                                                                                                                  | -     |
| Outcome data             | 15* | Report numbers of outcome events or summary measures over time                                                                                                                                               | 9     |
| Main results             | 16  | (a) Give unadjusted estimates and, if applicable, confounder-adjusted estimates and their precision (eg, 95% confidence interval). Make clear which confounders were adjusted for and why they were included | 10-11 |
|                          |     | (b) Report category boundaries when continuous variables were categorized                                                                                                                                    | 9     |
|                          |     | (c) If relevant, consider translating estimates of relative risk into absolute risk for a meaningful time period                                                                                             | -     |
| Other analyses           | 17  | Report other analyses done—eg analyses of subgroups and interactions, and sensitivity analyses                                                                                                               | 11    |
| <b>Discussion</b>        |     |                                                                                                                                                                                                              |       |
| Key results              | 18  | Summarise key results with reference to study objectives                                                                                                                                                     | 12-14 |
| <b>Limitations</b>       |     |                                                                                                                                                                                                              |       |
| Interpretation           | 20  | Give a cautious overall interpretation of results considering objectives, limitations, multiplicity of analyses, results from similar studies, and other relevant evidence                                   | 14    |
| Generalisability         | 21  | Discuss the generalisability (external validity) of the study results                                                                                                                                        | 15    |
| <b>Other information</b> |     |                                                                                                                                                                                                              |       |
| Funding                  | 22  | Give the source of funding and the role of the funders for the present study and, if applicable, for the original study on which the present article is based                                                | 16    |

\*Give information separately for cases and controls in case-control studies and, if applicable, for exposed and unexposed groups in cohort and cross-sectional studies.

**Note:** An Explanation and Elaboration article discusses each checklist item and gives methodological background and published examples of transparent reporting. The STROBE checklist is best used in conjunction with this article (freely available on the Web sites of PLoS Medicine at <http://www.plosmedicine.org/>, Annals of Internal Medicine at <http://www.annals.org/>, and Epidemiology at <http://www.epidem.com/>). Information on the STROBE Initiative is available at [www.strobe-statement.org](http://www.strobe-statement.org).

# BMJ Open

## Effectiveness of the 13-valent pneumococcal conjugate vaccine against adult pneumonia in Italy: a case-control study in a two-year prospective cohort

|                                 |                                                                                                                                                                                                                                                                                                                                                                                                                                                                                                                  |
|---------------------------------|------------------------------------------------------------------------------------------------------------------------------------------------------------------------------------------------------------------------------------------------------------------------------------------------------------------------------------------------------------------------------------------------------------------------------------------------------------------------------------------------------------------|
| Journal:                        | <i>BMJ Open</i>                                                                                                                                                                                                                                                                                                                                                                                                                                                                                                  |
| Manuscript ID                   | bmjopen-2017-019034.R2                                                                                                                                                                                                                                                                                                                                                                                                                                                                                           |
| Article Type:                   | Research                                                                                                                                                                                                                                                                                                                                                                                                                                                                                                         |
| Date Submitted by the Author:   | 12-Feb-2018                                                                                                                                                                                                                                                                                                                                                                                                                                                                                                      |
| Complete List of Authors:       | Prato, Rosa; University of Foggia, Department of Medical and Surgical Sciences<br>Fortunato, Francesca; Università degli Studi di Foggia, Department of Medical and Surgical Sciences<br>Cappelli, Maria; Università degli Studi di Foggia, Department of Medical and Surgical Sciences<br>Chironna, Maria; Università degli Studi di Bari Aldo Moro, Department of Biomedical Science and Human Oncology<br>Martinelli, Domenico; Università degli Studi di Foggia, Department of Medical and Surgical Sciences |
| <b>Primary Subject Heading</b>: | Infectious diseases                                                                                                                                                                                                                                                                                                                                                                                                                                                                                              |
| Secondary Subject Heading:      | Public health, Epidemiology                                                                                                                                                                                                                                                                                                                                                                                                                                                                                      |
| Keywords:                       | PCV13, Pneumococcal conjugate vaccine, Vaccine effectiveness, Adult, Community-acquired pneumonia                                                                                                                                                                                                                                                                                                                                                                                                                |
|                                 |                                                                                                                                                                                                                                                                                                                                                                                                                                                                                                                  |

SCHOLARONE™  
Manuscripts



1  
2  
3 Effectiveness of the 13-valent pneumococcal conjugate vaccine  
4  
5  
6  
7 against adult pneumonia in Italy: a case-control study in a two-  
8  
9  
10 year prospective cohort  
11  
12  
13  
14  
15

16 Rosa Prato<sup>1\*</sup>, Francesca Fortunato<sup>1</sup>, Maria Giovanna Cappelli<sup>1</sup>, Maria Chironna<sup>2</sup>, Domenico Martinelli<sup>1</sup>  
17

18 <sup>1</sup> Department of Medical and Surgical Sciences, University of Foggia, Foggia, Italy

19 <sup>2</sup> Department of Biomedical Science and Human Oncology, Aldo Moro University of Bari, Bari, Italy  
20  
21

22 **\*Corresponding Author**

23 Rosa Prato

24 Dipartimento di Scienze Mediche e Chirurgiche, Università degli Studi di Foggia

25 Polo Biomedico "E. Altomare" - Viale L. Pinto, 71122 – Foggia

26 Tel.: +39 (0)881 588036 – Fax. +39 (0)881 588047

27 E-mail: [rosa.prato@unifg.it](mailto:rosa.prato@unifg.it)  
28  
29  
30  
31  
32  
33  
34  
35  
36  
37  
38  
39  
40  
41  
42  
43  
44  
45  
46  
47  
48  
49  
50  
51  
52  
53  
54  
55  
56  
57  
58  
59  
60

## Abstract

**Objectives** Current strategies to prevent adult pneumococcal disease have been recently reviewed in Italy. We did a post-licensure study to estimate the direct effectiveness (VE) of the 13-valent pneumococcal conjugate vaccine (PCV13) against adult pneumococcal community-acquired pneumonia (pCAP).

**Study design** Between 2013-2015, a two-year prospective cohort study of adults with CAP was conducted in the Apulia region of Italy where the average vaccine uptake of PCV13 was 32% among adults  $\geq 65$  years. The test-negative design was used to estimate VE against all episodes of confirmed pCAP and vaccine-type (VT) CAP. VE in a subgroup of patients managed in the community was also estimated using a matched case-control design. VE was calculated as one minus the OR times 100%.

**Results** The overall VE of PCV13 was 33.2% (95% CI -106.6% to 82%) against pCAP irrespective of serotype and 38.1% (95% CI -131.9% to 89%) against VT-CAP in the cohort of adults  $\geq 65$  years. The VE was 42.3% (95% CI -244.1% to 94.7%) against VT-CAP in the age group at higher vaccine uptake. For the subgroup of cases managed in the community, the overall VE against disease due to any pneumococcal strain was 88.1% (95% CI 4.2% to 98.5%) and 91.7% (95% CI 13.1% to 99.2%) when we controlled for underlying conditions.

**Conclusions** Although our results are non-significant, PCV13 promises to be effective against all confirmed pCAP already with modest levels of uptake in the population of adults  $\geq 65$  years of age. Larger studies are needed to confirm the direct vaccine benefits.

**Keywords** PCV13, Pneumococcal conjugate vaccine, Vaccine effectiveness, Adult, Italy, Community-acquired pneumonia

## Strengths and limitation of this study

- The test-negative method used in this study has reduced the risk for selection bias since both cases and controls were recruited in one process and arose from the whole population when the same enrolment criteria were met.
- The study was designed to capture CAP cases managed in the community, reducing the underestimate of the true impact of pneumococcal disease.
- The active surveillance of CAP was performed in a single regional setting leading to a small study size reducing the power to detect statistically significant effects.
- The test-negative method may have overestimated PCV13 VE if, by reducing the risk of acquiring vaccine-type serotypes, vaccination increases the risk of acquiring non vaccine-type serotypes as is likely to be the case if there is serotype replacement.

## INTRODUCTION

Routine administration of the 7-valent conjugate vaccine (PCV7) since 2000 and of the second-generation conjugate vaccines (PCV10 and PCV13) since 2010 has resulted in an overall reduction in the rates of pneumococcal disease in both vaccinated and unvaccinated children, and indirectly among adults in several countries, owing to herd immunity.[1-2] However, the most recent available data suggest that significant burden still results from pneumococcal infection in older adults.

In the United States, the annual incidence of community-acquired pneumonia (CAP) requiring hospitalization in 2010-2012 was 24.8 cases (95% CI 23.5 to 26.1) per 10,000 adults 18 years of age or older, with a prevalence of pneumococcal disease of 5% and an incidence that was almost 5 times as high among adults 65 years of age or older as among younger adults.[3] In 2013, an estimated 10% of CAP cases in adults aged  $\geq 65$  years were caused by *S. pneumoniae* serotypes potentially preventable with the use of PCV13 in this population.[4]

In the UK, incidence of adult pneumococcal pneumonia declined over the 2008-2013 period, with serotypes included in PCV13 declining post-PCV13 introduction, suggesting an early herd protection effect from infant PCV13 on adult bacteraemic and non-bacteraemic disease. However, the most recent available data from 2012-2013 showed an incidence of 20.6 per 100,000 population for hospitalized adult pneumococcal CAP and 8.6 per 100,000 population for PCV13 serotype CAP.[5]

In Italy, high infant PCV13 coverage has been achieved since 2011 (vaccine uptake rate 90-95%).[6] For adults, only PPSV23 was recommended for routine immunization of those aged  $\geq 65$  years and at-risk individuals, but the vaccine uptake rates have been low to date. In recent years, some Italian regions have recommended PCV13 to adults with underlying diseases and to the elderly.[7]

Impact of PCV infant vaccination on adult pneumococcal pneumonia has not been well established in Italy. The hospitalization rates for pneumococcal pneumonia in the elderly population have remained relatively stable over the past decade, indicating a lack of herd protection amongst older age groups.[8]

In 2014, the CAPITA trial conducted in the Netherlands demonstrated the efficacy of PCV13 for the prevention, in those aged  $\geq 65$ , of vaccine-type pneumococcal CAP.[9] Evidence from the CAPITA trial led to new ACIP PCV13 recommendations,[4, 10-11] of which a review is planned for 2018 owing to potential

1  
2  
3 changes in the epidemiological situation. In particular, studies evaluating the post-licensure effectiveness of  
4 PCV13 for prevention of invasive and non-bacteremic pneumococcal pneumonia among adults  $\geq 65$  years old  
5 using a case control design are needed.[11] This study attempts to address this unmet need.  
6  
7

8  
9 We report findings of the direct impact of PCV13 from a two-year prospective study of a cohort of  
10 pneumococcal CAP adults.  
11  
12

## 13 14 15 16 17 **Methods** 18 19

20 From January 2013 until January 2015, a prospective, multicenter, population-based, active surveillance  
21 study of adults with CAP was conducted over two years in Apulia, a large Italian region of approximately  
22 4,000,000 inhabitants. PPSV23 was introduced in Apulia in 2000 for use in adults aged  $\geq 65$  years and was  
23 replaced by PCV13 in November 2011 for adults aged 65, 70, and  $\geq 75$  years.[12] In 2015, the average  
24 vaccine uptake of PCV13 was 32% amongst adults aged 65-75 years (11 cohorts) and 10% in the overall  
25 population  $> 75$  years.[13]  
26  
27  
28  
29  
30  
31

32 According to 2013 census figures, the designated surveillance area included about 788,000 adults 65 years of  
33 age or older.[14] Patients were enrolled in two different study settings from a network of 31 sentinel  
34 physicians. Surveillance for suspected CAP was conducted by 16 treating physicians among patients  
35 presenting at 13 hospitals located in the region (a total of 13,841 patients aged  $\geq 65$  years admitted to  
36 Departments of Respiratory Medicine in 2013-2014) and by 15 general practitioners (GPs) providing  
37 primary care for a total of 5,010 persons aged  $\geq 65$  years throughout the region.  
38  
39  
40  
41  
42  
43  
44

45 Adults  $\geq 65$  years with symptoms suggestive of lower respiratory tract infection were eligible for enrolment if  
46 they presented to a study hospital or to their GP for a clinical assessment; resided in the study region; had at  
47 least two of the eleven clinical criteria listed in Box 1; and had evidence of new infiltrates on chest  
48 radiography consistent with pneumonia.[15] Patients were excluded if they had been hospitalized recently  
49 ( $< 10$  days) or were functionally dependent nursing home, long-term care facility, or other institution  
50 residents (healthcare-associated pneumonia cases).  
51  
52  
53  
54  
55  
56  
57

### 58 **Box 1. Clinical criteria for definition of CAP** 59



- New cough or sputum production
- Fever  $>38.0^{\circ}\text{C}$  or hypothermia  $<36.1^{\circ}\text{C}$
- Chest pain
- Dyspnea
- Tachypnea
- New altered mental status
- Abnormal lung examination
- Respiratory failure
- Leukocytosis ( $>10 \times 10^9$  white blood cells/liter or  $>15\%$  bands) or leukopenia ( $<4.5 \times 10^9$  white blood cells/liter)
- C-reactive protein value  $>3$  times the upper limit of normal
- Hypoxemia with a partial oxygen pressure  $<60$  mm Hg while the patient was breathing room air

Written informed consent was obtained from all the patients or their caregivers before enrolment. Study sentinel physicians used a standardised electronic Case Report Form to collect information regarding patient demographics, clinical information, microbiological investigations and status regarding receipt of pneumococcal vaccination; pneumonia severity was assessed using the CURB-65 score (Confusion, Urea  $>7$  mmol/L, Respiratory rate  $\geq 30$  breaths/min, low systolic  $<90$  mm Hg or diastolic  $\leq 60$  mm Hg Blood pressure, age  $\geq 65$  years). Patients were contacted 30 days after enrolment for outcome measures collection (30-day mortality, recovery with *sequelae*).

The study protocol was approved by the Institutional Review Board at the Apulian Regional Observatory for Epidemiology (PROT:18/OER/2012 February 20, 2012). The study was conducted according to the principles expressed in the Declaration of Helsinki.

Blood samples and nasopharyngeal swabs were obtained from the patients who presented to sentinel centers/GPs with symptoms of lower respiratory tract infection within 24 hours after presentation. In the case of patients with a productive cough, sputum was obtained. Bronchoalveolar-lavage (BAL) samples, blood-culture and sputum specimens that had been obtained for clinical care were sent to the Regional Reference Laboratory for Invasive Bacterial Diseases and analysed for the study.

*S. pneumoniae* was isolated by PCR and multiplex sequential PCR. Bacterial genomic DNA was extracted from 200  $\mu\text{l}$  of biological samples using the QIAamp Dneasy Blood and Tissue kit (Qiagen), according to the manufacturer's instructions. Detection of *S. pneumoniae* was performed using a commercial multiplex assay (Pneumobacter ACE Detection for blood and Meningitis ACE Detection for CSF, Seegene; Sensitivity: detection limit of the Seeplex Pneumobacter Ace Detection = 10 copy/reaction – 10 copy/3  $\mu\text{l}$  DNA). *S.*

1  
2  
3 *pneumoniae* serotyping was performed on PCR positive samples through a sequential multiplex PCR.[16]  
4  
5 Twenty-nine primer pairs were designed to target serotypes 1, 3, 4, 5, 6 A/B, 7F, 7C, 8, 9V, 10A, 11A, 12F,  
6  
7 14, 15A, 15 B/C, 16F, 17F, 18, 19A, 19F, 20, 22F, 23F, 31, 33F, 34, 35B, 35F, and 38. A primer pair  
8  
9 (primers cpsA-f and cpsA-r) was also included as an internal control targeting the cpsA (pneumococcal  
10  
11 capsular polysaccharide synthesis gene) locus found in all pneumococci.[17] The amplified products, ranging  
12  
13 from 250 bp to 988 bp, were analyzed by means of electrophoresis on a 2% agarose gel (Life Technologies)  
14  
15 and visualization under UV light.

16  
17 Patients with a positive PCR result for *S. pneumoniae* on blood/sputum/BAL were deemed to have  
18  
19 pneumococcal CAP. Nasopharyngeal swabs samples were not used for the diagnosis of pCAP, due to the  
20  
21 poor sensitivity and specificity previously reported.[3]  
22  
23

## 24 **Vaccine Effectiveness analysis**

25  
26  
27 To estimate the vaccine effectiveness (VE) of PCV13 in the prevention of pneumococcal CAP, a test-  
28  
29 negative design was performed on cases enrolled during the study surveillance period. The analysis included  
30  
31 two primary end points:  
32

- 33 I. **VE in preventing confirmed pneumococcal CAP irrespective of serotype**, where cases were patients  
34  
35 who had an episode of invasive or non-invasive pCAP due to any pneumococcal strain and controls were  
36  
37 participants with an episode of non pneumococcal pneumonia;  
38
- 39 II. **VE in preventing confirmed vaccine-type (VT) CAP**, where cases were patients with an episode of  
40  
41 invasive or non-invasive pCAP due to vaccine-type strains and controls were patients with non-vaccine-  
42  
43 type (NVT) pneumococcal CAP, non-typable isolates or non pneumococcal pneumonia.  
44

45  
46 These two end points were further assessed among patients who had underlying conditions.  
47

48  
49 The exposure of interest was vaccination with PCV13. The exposure to PPSV23 given <5 years prior to  
50  
51 study enrolment was also assessed. Data were based on verified vaccine (both PCV13 and PPSV23)  
52  
53 information and not self-report.  
54

55  
56 To further study the effectiveness of PCV13 in the prevention of episodes of confirmed pCAP managed in  
57  
58 the community, post hoc analysis of a subgroup of cases reported by GPs network was performed. This  
59

1  
2  
3 analysis was performed according to a 1:3 matched case-control design. For every enrolled patient, a list of  
4 potential asymptomatic controls was generated from GPs subjects' medical records. Three controls, matched  
5 by GP, age, and gender, were selected at random for each case. Controls were enrolled if they provided  
6 written informed consent to their GP. Study personnel contacted these GPs to obtain a medical and  
7 vaccination history for every control. Immunization information system was also used to verify vaccination  
8 histories.  
9  
10  
11  
12  
13  
14

## 15 **Statistical Analysis**

16  
17  
18 Statistical analyses were performed in STATA (version 14; StataCorp, College Station, TX, USA).

19  
20  
21 Chi-square analysis or Fisher's exact test, 2-sided, were used to calculate the p-value for the difference  
22 between study groups in percentages of subjects reporting a pCAP or non pneumococcal pneumonia.  
23

24  
25 Exact logistic regression was used to calculate the unadjusted odds ratios (ORs) of vaccination together with  
26 95% confidence intervals (95% CI). In the post hoc subgroup analysis, the matched ORs for vaccination in  
27 cases and controls were calculated using conditional logistic regression, controlling for the presence of  
28 underlying conditions. Vaccine effectiveness was calculated as one minus the OR times 100%.  
29  
30  
31  
32  
33  
34

## 35 **RESULTS**

36  
37  
38 From the 1,867 eligible adults identified over the two-year period, 226 consented to the study. Main reasons  
39 why patients (or a relative) declined to participate were old age, difficulty in reading and/or understanding  
40 the invite letter, acute confusion or cognitive impairment, or a desire not to have medication altered. Of 226  
41 patients recruited, 176 (77.9%) were admitted to Departments of Respiratory Medicine and 50 (22.1%) were  
42 registered with a GP. Pneumonia severity was low, moderate and high in 47 (20.8%), 167 (73.9%) and 12  
43 (5.3%) adults, respectively. Forty patients were excluded as they were unable to provide a blood or a  
44 sputum/BAL sample, leaving 186 in the cohort for analyses. The median age of the cohort was 79 years  
45 (interquartile range, 73 to 85) and 65 (34.9%) were female. Twenty (10.8%) had received PCV13 and 60  
46 (32.3%) had received PPSV23 <5 years prior to enrolment (Table 1). The seasonal distribution of CAP cases  
47  
48  
49  
50  
51  
52  
53  
54  
55  
56  
57  
58  
59  
60

followed a pattern similar to that of many other respiratory diseases, with similar peaks during the winter months of the two-year period (Figure 1).

**Table 1. Characteristics of adults with community-acquired pneumonia requiring hospitalization or managed in the community**

|                                                                         | Pneumococcal group<br>(N = 59) | Non-pneumococcal group<br>(N = 127) | CAP cohort<br>(N = 186) |
|-------------------------------------------------------------------------|--------------------------------|-------------------------------------|-------------------------|
| <b>Demographics</b>                                                     |                                |                                     |                         |
| Age years                                                               | 79 (71 to 83)                  | 79 (73 to 85)                       | 79 (73 to 85)           |
| Male                                                                    | 42 (71.2)                      | 79 (62.2)                           | 121 (65.1)              |
| <b>Reporting</b>                                                        |                                |                                     |                         |
| Hospital physicians                                                     | 38 (64.4)                      | 105 (82.7)                          | 143 (76.9)              |
| GPs                                                                     | 21 (35.6)                      | 22 (17.3)                           | 43 (23.1)               |
| <b>Any underlying comorbidity*</b>                                      |                                |                                     |                         |
| Chronic heart disease                                                   | 28 (47.5)                      | 70 (55.1)                           | 98 (52.7)               |
| Chronic respiratory disease                                             | 29 (49.2)                      | 52 (40.9)                           | 81 (43.6)               |
| Diabetes                                                                | 14 (23.7)                      | 32 (25.2)                           | 46 (24.7)               |
| Chronic kidney disease                                                  | 2 (3.4)                        | 9 (7.1)                             | 11 (5.9)                |
| Chronic liver disease                                                   | 2 (3.4)                        | 3 (2.4)                             | 5 (2.6)                 |
| Malignancy                                                              | 0                              | 4 (3.1)                             | 4 (2.1)                 |
| Asplenia                                                                | 1 (1.7)                        | 1 (0.8)                             | 2 (1.1)                 |
| <b>Status regarding receipt of pneumococcal vaccination<sup>†</sup></b> |                                |                                     |                         |
| PCV13                                                                   | 5 (8.5)                        | 15 (11.8)                           | 20 (10.8)               |
| PPSV23 given <5 years prior to study enrolment                          | 20 (33.9)                      | 40 (31.5)                           | 60 (32.3)               |
| <b>Outcomes<sup>§</sup></b>                                             |                                |                                     |                         |
| 30-day mortality                                                        | 2 (3.4)                        | 2 (1.6)                             | 4 (2.2)                 |
| Recovery with <i>sequelae</i>                                           | 5 (8.5)                        | 20 (15.7)                           | 25 (13.4)               |

Data are number, median (interquartile range) or number (%). \*The groups were not mutually exclusive and therefore do not sum to 100%. <sup>†</sup>For both vaccines, patients were considered to be vaccinated if they had received the vaccine at least 2 weeks before enrolment. Data were missing for four patients in the non-pneumococcal group. One patient had received a dose of PCV13  $\geq 1$  year after receipt of a PPSV23 dose given <5 years prior to study enrolment. <sup>§</sup>Data were missing for 20 patients in the pneumococcal group and 40 patients in the non-pneumococcal group.

A nasopharyngeal swab was obtained from 171 of the 186 (91.9%) participants, a blood sample from 152 (81.7%), a sputum specimen from 139 (74.7%), and a BAL specimen from 3 (1.6%). *S. pneumoniae* was detected in 71 (41.5%) nasopharyngeal swab, 2 (1.3%) blood, 55 (39.6%) sputum, and 2 (66.7%) BAL.

Of 186 in the CAP cohort, 59 (31.7%, 95% CI 25.7 to 38.9%) adults were identified as pneumococcal CAP. More than half (31, 52.5%) had disease caused by one of the PCV7 serotypes, of which 23F, 9V, 14, 4 and 19F were the most common; 8 (13.6%) had CAP due to additional PCV13 serotypes, of which 19A and 3 were the most common; 9 (15.2%) had CAP due to serotypes only contained in PPSV23; 4 (6.8%) had non-vaccine-type disease; 7 (11.9%) had nontypeable pneumococcal CAP (Figure 1). Five had received one dose

of PCV13 and 20 one dose of PPSV23 <5 years prior to enrolment. Of 39 patients infected with serotypes contained in PCV13, three had received this vaccine (disease caused by 9V in two cases and 23F in one) (Figure 2).

Baseline characteristics and outcomes were balanced between pneumococcal and non-pneumococcal groups (Table 1).

## Vaccines Effectiveness

PCV13 VE estimate was 33.2% (95% CI -106.6% to 82%) against pneumococcal CAP irrespective of serotype and 38.1% (95% CI -131.9% to 89%) against vaccine-type CAP in the cohort of adults  $\geq 65$  years. The VE was 42.3% (95% CI -244.1% to 94.7%) with respect to VT-CAP in the age group at higher vaccine uptake (65-75 years).

The VE was 34.6% (95% CI -104.6% to 82.5%) against CAP due to any pneumococcal strain and 40.1% (95% CI -127.5% to 89.4%) against CAP due to vaccine-type strains for adults with underlying conditions.

PCV13 VE against the two primary end points in patients naïve to PPSV23 or vaccinated with PPSV23  $\geq 5$  years prior to enrolment was 27.35% (95% CI -136.5% to 81.5%) and 17% (95% CI -234.7% to 85.9%) respectively, lower than VE estimates in subgroups defined irrespective of PPSV23 immune status (Table 2).

**Table 2. PCV13 effectiveness estimates against all episodes of confirmed pneumococcal CAP and CAP due to vaccine serotypes in adults by vaccination status and the presence of underlying conditions**

|                                                                                                          | Cases<br>vaccinated/<br>unvaccinated | Controls<br>vaccinated/<br>unvaccinated§ | Vaccine<br>effectiveness | 95% CI           |
|----------------------------------------------------------------------------------------------------------|--------------------------------------|------------------------------------------|--------------------------|------------------|
| Pneumococcal CAP (any strain)                                                                            | 5/54                                 | 15/108*                                  | 33.2%                    | -106.6% to 82%   |
| Vaccine-type CAP                                                                                         | 3/36                                 | 17/126 <sup>†</sup>                      | 38.1%                    | -131.9% to 89%   |
| Vaccine-type CAP in the age group at higher vaccine uptake (65-75 years)                                 | 2/14                                 | 8/32 <sup>†</sup>                        | 42.3%                    | -244.1% to 94.7% |
| Pneumococcal CAP in patients with $\geq 1$ comorbid disorder                                             | 5/46                                 | 15/90*                                   | 34.6%                    | -104.6% to 82.5% |
| Vaccine-type CAP in patients with $\geq 1$ comorbid disorder                                             | 3/31                                 | 17/105 <sup>†</sup>                      | 40.1%                    | -127.5% to 89.4% |
| Pneumococcal CAP in patients naïve to PPSV23 or vaccinated with PPSV23 $\geq 5$ years prior to enrolment | 5/34                                 | 14/69*                                   | 27.3%                    | -136.5% to 81.5% |
| Vaccine-type CAP in patients naïve to PPSV23 or vaccinated with PPSV23 $\geq 5$ years prior to enrolment | 3/19                                 | 16/84 <sup>†</sup>                       | 17%                      | -234.7% to 85.9% |

\*Controls were patients with an episode of non pneumococcal pneumonia. <sup>†</sup>Controls were patients with NVT pneumococcal CAP, non-typable isolates or non pneumococcal pneumonia. §Vaccine data were missing for four controls.

PPSV23 was not shown to have effectiveness against pneumococcal CAP in either all adults (VE -4%, 95% CI -115.4% to 50.4%) or those with comorbidities (VE -5.5%, 95 %CI: -130.5% to 52.2%) naïve to PCV13.

Post hoc subgroup analysis of 21 confirmed cases reported by GPs network (Table 1) provided estimates of PCV13 effectiveness in preventing pneumococcal CAP managed in the community.

We identified 4,965 asymptomatic adults as potential controls, of whom 129 (2.6%) died and 95 (1.9%) were excluded because they left the GP's practice during the study period. Among the remaining 4,741 controls, 63 (three per case) were selected for the analysis. Nine (14.2%) controls were replaced for difficulty in obtaining consent.

Review of GP records showed that the controls were of similar age and gender to cases, but differed in vaccination and clinical history: one case (4.8%) and one control (1.6%) had received PCV13 at least 2 weeks before enrolment, whereas 18 controls (28.6%) were vaccinated during the study period; 16 cases (76.2%) and 36 controls (57.1%) had at least one comorbid disorder.

The overall effectiveness of PCV13 against disease due to any pneumococcal strain was 88.1% (95% CI 4.2% to 98.5%) and 91.7% (95% CI 13.1% to 99.2%) when we controlled for underlying conditions (Figure 3).

## DISCUSSION

To our knowledge, this is the first study to investigate the effectiveness of PCV13 for prevention of invasive and non-invasive pneumococcal pneumonia among adults  $\geq 65$  years. The overall VE was 33.2% against pCAP irrespective of serotype and 38.1% against VT-CAP. The VE was 42.3% against VT-CAP in the age group at higher vaccine uptake. Moreover, we estimated a vaccine effectiveness of 88.1% against confirmed pneumococcal CAP managed in the community, where most patients are treated as outpatients. Given that a substantial proportion of studies are based on hospitalised patients, the true burden of disease is not known in Europe, where only Finland, Spain and the UK have precise epidemiological data on CAP.[18-19]

1  
2  
3 In this study, PCV13 serotypes accounted for 66% of all confirmed pneumococcal CAP. National Invasive  
4 Bacterial Diseases surveillance data from Italy showed that, despite an uncertain reduction in the proportion  
5 of PCV13 serotypes in the period 2010–2012, these were still responsible for about 56% of cases among  
6 over-65s.[20] These data suggest that PCV13 vaccine-type pneumococcal disease continues to have a high  
7 burden in adults in Italy despite childhood PCV13 vaccination and would indicate a lack of herd protection  
8 effects in older age groups, in comparison to the vaccinated paediatric population.[8, 20-21] The most recent  
9 data in the UK suggest that, despite an ongoing trend of reduced incidence of PCV13 serotype CAP from  
10 paediatric conjugate vaccines,[5, 22] PCV13 serotypes currently account for 12.6% of all cases of CAP and  
11 41% of pneumococcal CAP in adults.[18] In Ireland, in over 5 years following PCV13 introduction to  
12 routine childhood vaccination, the number of IPD associated with additional PCV13 serotypes in adults  $\geq 65$   
13 years of age has remained relatively unchanged due to the persistence in serotypes 3 and 19A in this age-  
14 group.[23] In Spain, 13 years after introduction of PCV7/PCV13 for children, a significant proportion of  
15 adults continue to develop vaccine serotype CAP, suggesting an insufficient indirect protection. [24]  
16 Because it cannot be assumed that a decline in pneumococcal disease incidence observed in some countries  
17 will always be mirrored elsewhere in the same time, adults aged  $\geq 65$  years may have a great potential for  
18 disease reduction from PCV13 and may be a primary target of vaccination programmes.[9] This is  
19 particularly noteworthy for Italian population because the burden of CAP and pneumococcal disease in  
20 general is expected to increase with the aging society, even with the impact of childhood and adult vaccine  
21 programmes.[18, 25]

22  
23  
24  
25  
26  
27  
28  
29  
30  
31  
32  
33  
34  
35  
36  
37  
38  
39  
40  
41 In our study, most of CAP was caused by PCV13 serotypes 23F, 9V, 14, 19A, 4, 19F, and 3 (Figure 2) that  
42 are among the less susceptible to antibiotics.[26] Recent findings for Switzerland showed that, while non-  
43 susceptible serotypes 19A, 9V, 6B, 23F and 14 among invasive and non-invasive *S. pneumoniae* decreased  
44 over time in patients up to age 64 years vaccination due to PCVs infant vaccination,[27-29] in patients older  
45 than 64 years with invasive *S. pneumoniae* resistance rates remained unchanged.[30] By preventing disease  
46 caused by resistant strains, adult PCV13 vaccination provides a robust strategy for combating antimicrobial  
47 resistance that is a growing problem in Europe.[31]

1  
2  
3 On January 19, 2017, PCV13 has been introduced into the routine vaccination schedule in Italy for all adults  
4 65 years of age followed by a dose of PPV23.[32] The decision-making regarding its introduction was based  
5 on the CAPITA trial results and the ACIP recommendations, but also on a long history of experience of adult  
6 pneumococcal conjugate vaccination in some Italian regions including Apulia.[7, 12]  
7  
8  
9

10  
11 In this prospective cohort study of adults with CAP we found that PCV13 promise to be protective against all  
12 episodes of confirmed pneumococcal CAP (VE 33.2%) and against disease caused by serotypes contained in  
13 the vaccine (VE 38.1%). Recently published findings of the exploratory efficacy endpoint analysis of the  
14 CAPITA trial showed VE of 29% for all episodes of confirmed pneumococcal CAP and 43% for all non-  
15 bacteremic and noninvasive episodes of VT pneumococcal CAP,[33] findings consistent with the primary  
16 efficacy analysis.[9] On an ecological level, a preliminary analysis of hospitalization rates for adult  
17 pneumococcal CAP in Apulia region showed early PCV13 impact after the implementation of an adult  
18 vaccine programme (from 180,5 per 100,000 during 2006-2011 to 162,4 per 100,000 during 2012-2016;  
19 hospitalization risk ratio: 0,9 95% CI 0.83 to 0.97). [unpublished observations]  
20  
21  
22  
23  
24  
25  
26  
27  
28  
29

30 Moreover, our results showed that PCV13 promise to be effective for prevention of vaccine-type CAP  
31 already with modest levels of uptake in the target population (VE 42.3%). These data would suggest that  
32 rapid uptake and improved coverage of PCV13 among adults in the short term could maximize its  
33 impact.[11, 34]  
34  
35  
36  
37  
38

39 The incidence of pneumococcal CAP is greatly increased in many individual clinical risk groups.[35] Since  
40 when the ACIP recommended PCV13 for immunocompromised adults in 2012, there remains little evidence  
41 regarding the efficacy of the vaccine in at risk populations.[36, 9, 37] Our findings would suggest that  
42 vaccination with PCV13 may be effective in preventing pneumococcal disease in adults  $\geq 65$  years with  
43 comorbid disorders. This observation, taken together with no effectiveness showed by PPV23 in our cohort,  
44 will require further studies to verify how adults with chronic diseases may fully benefit of the ACIP and the  
45 new Italian recommendations for the use of both PCV13 and PPSV23 in series. A recent systematic review  
46 and meta-analysis designed to estimate the efficacy of PPV23 in the prevention of pCAP, particularly in  
47 patients above 60 years of age and adults with underlying diseases, showed that PPV23 vaccination “alone”  
48  
49  
50  
51  
52  
53  
54  
55  
56  
57  
58  
59  
60



1  
2  
3 does not demonstrate clear efficacy, supporting the administration of a dose of PCV13 first followed by a  
4  
5 dose of PPV23 at least 8 weeks later.[38]

6  
7 Another recent systematic review of the burden of vaccine preventable pneumococcal disease in UK adults  
8  
9 did not identify studies that were conducted in the community, where the majority of pCAP is managed.[18]  
10  
11 In our study, as it was designed to capture both invasive and non-invasive pneumococcal CAP,  
12  
13 approximately 36% of cases had been reported by general practitioners, suggesting that hospital based  
14  
15 studies may underestimate the true impact of pneumococcal disease. Post hoc subgroup analysis of cases  
16  
17 managed in the community provided estimates of PCV13 effectiveness with respect to CAP from any  
18  
19 pneumococcal serotype and this value did not change when we controlled for the presence of underlying  
20  
21 disorders.

22  
23 This study has several limitations. First, it was performed in a single region with a long-lasting history of  
24  
25 experience of adult pneumococcal conjugate vaccination. Therefore, data from our setting may not be  
26  
27 representative of the entire Italian adult population or generalizable to other settings. Moreover, data  
28  
29 regarding the epidemiology of pCAP in adults in Italy are very limited and a large variability among  
30  
31 published studies exists.[20]

32  
33  
34 Second, the recruitment rate was very low affecting the representativeness of the sample. The pre-study  
35  
36 sample size calculation was 750 CAP cases aged over 64 years in the selected study area over a three years  
37  
38 period of observation foreseen. We had estimated this sample size in the absence of a VE estimate as that  
39  
40 provided by the CAPITA trial in 2014. As a reflection of the impact of stopping the study early (for  
41  
42 administrative reasons), we had a much smaller recruitment than originally planned. However, there was not  
43  
44 a risk for selection bias since both cases and controls were recruited in one process and arose from the whole  
45  
46 population when the same enrolment criteria were met.

47  
48 Third, 40 out of 226 enrolled patients were unable to provide a blood or a sputum/BAL sample, which could  
49  
50 have led to underestimation or overestimation of pneumococcal aetiology rates. Owing to ethical and  
51  
52 feasibility considerations, specimens were obtained only for clinical care and no invasive procedures were  
53  
54 performed for this study, which may have reduced the microbiologic yield. However, 82% of the adults had  
55  
56 at least one specimen type available for *S. pneumoniae* detection.

1  
2  
3 The study size was small reducing the power to detect statistically significant effects, although  
4 pneumococcal aetiology was identified in 31.7% CAP adults. Recent corresponding figure from Rodrigo et  
5 al. for UK was 29.3%.[5] The main limitation, however, pertains to the small numbers of PCV13 vaccinated  
6 cases and controls underlying the estimation of the vaccine effectiveness accounting for wide 95% CIs  
7 including zero. Although VE estimates should be interpreted with caution, our calculation reflected the still  
8 low PCV13 coverage achieved in the vaccinated cohorts. It was, therefore, too early to narrow the  
9 confidence limits around the point-estimate of effectiveness.  
10  
11

12  
13  
14  
15  
16  
17 Fourth, the test-negative method may overestimate VE if, by reducing the risk of acquiring VT serotypes,  
18 vaccination increases the risk of acquiring NVT as is likely to be the case if there is serotype replacement.  
19

20  
21 Fifth, we were not able to assess the effectiveness of individual vaccine serotypes, as there were too few  
22 cases to allow statistical comparison between study groups.  
23  
24

25  
26 Nonetheless, our study pointed out important gaps regarding the burden of pneumococcal CAP in Italy  
27 where there are limited data outside of national surveillance of IPD and the only available data for non-  
28 invasive disease are limited to hospitalization for pneumococcal pneumonia that, however, lack of serotyping  
29 information.[20] The active surveillance of adult confirmed CAP, drawn from a relative stable population  
30 over a two-year period, was a strength of our study and allowed us to estimate the effectiveness of the 13-  
31 valent pneumococcal conjugate vaccine against all confirmed CAP, without regard to serotype, the presence  
32 of underlying conditions, and the site of patient management (hospital/community).  
33  
34  
35  
36  
37  
38

39  
40 This study has clinical practice implications for pneumococcal vaccination policies in adults in countries  
41 where PCV13 is becoming part of routine immunization of the elderly. Although our results are non-  
42 significant, they can stimulate to perform larger studies that would probably confirm the vaccine  
43 effectiveness but probably with narrower confidence intervals than those presented here.  
44  
45  
46  
47  
48  
49  
50  
51  
52  
53  
54  
55  
56  
57  
58  
59  
60

## ACKNOWLEDGEMENTS

We thank the patients who consented to participate in this study; the sentinel physicians for their contributions to the enrolment of patients and collection of data (Maria Aliani, Mario Bisconti, Donato Vincenzo Catamerò, Vittoria Rosaria Costa, Elio Costantino, Gaetano D'Ambrosio, Francesco Dadduzio, Antonio De Maria, Mario Domenico Dell'Orco, Mario Lucio Dell'Orco, Pier Luigi Di Napoli, Oronzo Filieri, Maria Pia Foschino Barbaro, Vincenzo Frappampina, Donato Lacedonia, Giuseppe Vincenzo Laera, Luciana Labate, Paolo Lombardi, Michele Maiellari, Orazio Lippolis, Francesco Mariani, Antonio Metrucci, Gabriele Miolli, Onofrio Resta, Luigi Santoiemma, Teresa Scarabaggio, Salvatore Talamo); Anna Lisa De Robertis for her valuable laboratory work.

## COMPETING INTERESTS

We have read and understood BMJ policy on declaration of interests and declare the following interests: RP reports grants from Pfizer, during the conduct of the study; grants, personal fees and non-financial support from Pfizer, personal fees and non-financial support from SanofiPasteurMSD, personal fees and non-financial support from GSK, outside the submitted work. DM reports grants and non-financial support from GSK, non-financial support from SanofiPasteurMSD, non-financial support from Pfizer, outside the submitted work. FF, MGC and MC declare that they have no competing interests.

## SUPPORT STATEMENT

This work was in part supported by Pfizer unrestricted Investigator-Initiated Research Grant IRR WS 2164183.

## CONTRIBUTORS

RP and DM conceptualised and designed the work, analysed and interpreted data, and writing the manuscript. FF and MGC contributed to the data collection, managed the database and provided statistical support. MC performed the laboratory work. All authors have read and approved the final manuscript.

1  
2  
3  
4  
5  
6  
7  
8  
9  
10  
11  
12  
13  
14  
15  
16  
17  
18  
19  
20  
21  
22  
23  
24  
25  
26  
27  
28  
29  
30  
31  
32  
33  
34  
35  
36  
37  
38  
39  
40  
41  
42  
43  
44  
45  
46  
47  
48  
49  
50  
51  
52  
53  
54  
55  
56  
57  
58  
59  
60

## DATA SHARING STATEMENT

There are no unpublished data available.

For peer review only

## REFERENCES

1. Weil-Olivier C, Gaillat J. Can the success of pneumococcal conjugate vaccines for the prevention of pneumococcal diseases in children be extrapolated to adults? *Vaccine* 2014;32(18):2022-6. doi: 10.1016/j.vaccine.2014.02.008.
2. Griffin MR, Zhu Y, Moore MR, et al. U.S. hospitalizations for pneumonia after a decade of pneumococcal vaccination. *N Engl J Med* 2013;369(2):155-63. doi: 10.1056/NEJMoa1209165.
3. Jain S, Self WH, Wunderink RG, et al. Community-Acquired Pneumonia Requiring Hospitalization among U.S. Adults. *N Engl J Med* 2015;373(5):415-27. doi: 10.1056/NEJMoa1500245.
4. Tomczyk S, Bennett NM, Stoecker C, et al. Use of 13-valent pneumococcal conjugate vaccine and 23-valent pneumococcal polysaccharide vaccine among adults aged  $\geq 65$  years: recommendations of the Advisory Committee on Immunization Practices (ACIP). *MMWR Morb Mortal Wkly Rep* 2014;63(37):822-5.
5. Rodrigo C, Bewick T, Sheppard C, et al. Impact of infant 13-valent pneumococcal conjugate vaccine on serotypes in adult pneumonia. *Eur Respir J* 2015;45:1632-41. doi: 10.1183/09031936.00183614.
6. Centro nazionale per la prevenzione delle malattie e la promozione della salute, Istituto superiore di sanità. Copertura vaccinale in Italia. Le vaccinazioni in Italia. 2016. Italy. Available from: [http://www.epicentro.iss.it/temi/vaccinazioni/dati\\_Ita.asp](http://www.epicentro.iss.it/temi/vaccinazioni/dati_Ita.asp) (Accessed August 4, 2017).
7. Castiglia P. Recommendations for pneumococcal immunization outside routine childhood immunization programs in Western Europe. *Adv Ther* 2014;31(10):1011-44. doi: 10.1007/s12325-014-0157-1.
8. Prato R, Fortunato F, Martinelli D. Pneumococcal pneumonia prevention among adults: is the herd effect of pneumococcal conjugate vaccination in children as good a way as the active immunization of the elderly? *Curr Med Res Opin* 2016;32(3):543-5. doi: 10.1185/03007995.2015.1131150.
9. Bonten MJ, Huijts SM, Bolkenbaas M, et al. Polysaccharide conjugate vaccine against pneumococcal pneumonia in adults. *N Engl J Med* 2015;372:1114-25. doi: 10.1056/NEJMoa1408544.
10. Kobayashi M, Bennett NM, Gierke R, et al. Intervals Between PCV13 and PPSV23 Vaccines: Recommendations of the Advisory Committee on Immunization Practices (ACIP). *MMWR Morb Mortal Wkly Rep* 2015;64(34):944-7. doi: 10.15585/mmwr.mm6434a4.

- 1  
2  
3 11. Pilishvili T, Bennett NM. Pneumococcal disease prevention among adults: strategies for the use of  
4 pneumococcal vaccines. *Vaccine* 2015;33 Suppl 4:D60-5. doi: 10.1016/j.vaccine.2015.05.102.
- 5  
6  
7 12. Deliberazione della Giunta Regionale 20 maggio 2014, n. 95. Commissione Regionale Vaccini.  
8 Modifica Calendario Regionale per la vita 2012 - DGR 241/2013. Approvazione nuovo Calendario  
9 Vaccinale per la vita 2014. Bollettino Ufficiale della Regione Puglia n. 74 of 11/06/2014. 2014. Italy.  
10 Available from: [http://beta.regione.puglia.it/documents/10180/4782589/N74\\_11\\_06\\_14.pdf](http://beta.regione.puglia.it/documents/10180/4782589/N74_11_06_14.pdf) (Accessed  
11 August 4, 2017).
- 12  
13  
14  
15  
16 13. Osservatorio Epidemiologico della regione Puglia. Bollettino delle Coperture Vaccinali - Resoconto sul  
17 monitoraggio delle attività vaccinali regionali condotte negli anni 2007-2015. 2016. Italy. Available  
18 from: <https://www.sanita.puglia.it/documents/36126/269121/Bollettino+delle+Coperture+Vaccinali+-+Anni+2007+-+2015/f078c7d1-a19c-40de-8246-a2ae36278024?version=1.0&t=1491399965137>  
19  
20  
21  
22  
23  
24 (Accessed August 4, 2017).
- 25  
26 14. Istituto Nazionale di Statistica. Popolazione Residente per età, sesso e stato civile al 1° gennaio 2015.  
27 2015. <http://www.demoistat.it>. (Accessed August 4, 2017).
- 28  
29  
30 15. Chow AW, Hall CB, Klein JO, et al. Evaluation of new anti-infective drugs for the treatment of  
31 respiratory tract infections. Infectious Diseases Society of America and the Food and Drug  
32 Administration. *Clin Infect Dis* 1992;15(Suppl 1):S62-88.
- 33  
34  
35 16. Pai R, Gertz RE, Beall B. Sequential multiplex PCR approach for determining capsular serotypes of  
36  
37  
38  
39  
40  
41  
42  
43  
44  
45  
46  
47  
48  
49  
50  
51  
52  
53  
54  
55  
56  
57  
58  
59  
60 17. Mavroidi A, Godoy D, Aanensen DM, et al. Evolutionary genetics of the capsular locus of serogroup 6  
pneumococci. *J Bacteriol* 2004;186:8181-92. doi: <http://dx.doi.org/10.1128/JB.186.24.8181-8192.2004>.  
18. Chalmers JD, Campling J, Dicker A, et al. A systematic review of the burden of vaccine preventable  
pneumococcal disease in UK adults. *BMC Pulm Med* 2016;16(1):77. doi: 10.1186/s12890-016-0242-0.  
19. Welte T, Torres A, Nathwani D. Clinical and economic burden of community-acquired pneumonia  
among adults in Europe. *Thorax* 2012;67(1):71-9. doi: 10.1136/thx.2009.129502.  
20. Rota MC, Bella A, D'Ancona F, et al. Vaccini anti-pneumococcici: dati ed evidenze per l'utilizzo nei  
soggetti a rischio di qualsiasi età e per l'eventuale ampliamento dell'offerta ai soggetti anziani (dicembre

- 2013). 2015. Roma: Istituto Superiore di Sanità. Rapporti ISTISAN 15/13. Available from: [http://www.iss.it/binary/publ/cont/15\\_13.pdf](http://www.iss.it/binary/publ/cont/15_13.pdf) (Accessed August 4, 2017).
21. Fortunato F, Martinelli D, Cappelli MG, et al. Impact of pneumococcal conjugate universal routine vaccination on pneumococcal disease in Italian children. *J Immunol Res* 2015;2015:206757. doi: <http://dx.doi.org/10.1155/2015/206757>.
22. Waight PA, Andrews NJ, Ladhani SN, et al. Effect of the 13-valent pneumococcal conjugate vaccine on invasive pneumococcal disease in England and Wales 4 years after its introduction: an observational cohort study. *Lancet Infect Dis* 2015;15(5):535–43. doi: [http://dx.doi.org/10.1016/S1473-3099\(15\)70044-7](http://dx.doi.org/10.1016/S1473-3099(15)70044-7).
23. Corcoran M, Vickers I, Mereckiene J, et al. The epidemiology of invasive pneumococcal disease in older adults in the post-PCV era. Has there been a herd effect? *Epidemiol Infect* 2017;145(11):2390-2399. doi: 10.1017/S0950268817001194.
24. Menéndez R, España PP, Pérez-Trallero E, et al. The burden of PCV13 serotypes in hospitalized pneumococcal pneumonia in Spain using a novel urinary antigen detection test. CAPA study. *Vaccine* 2017 ;35(39):5264-5270. doi: 10.1016/j.vaccine.2017.08.007.
25. Institute for Health Metrics and Evaluation (IHME). Life Expectancy & Probability of Death. Seattle, WA: IHME, University of Washington. 2017. Available from: <http://vizhub.healthdata.org/le/> (Accessed August 4, 2017).
26. Song JH, Dagan R, Klugman KP, Fritzell B. The relationship between pneumococcal serotypes and antibiotic resistance. *Vaccine* 2012;30(17):2728-37. doi: 10.1016/j.vaccine.2012.01.091.
27. Hauser C, Kronenberg A, Allemann A, et al. Serotype/serogroup-specific antibiotic non-susceptibility of invasive and non-invasive *Streptococcus pneumoniae*, Switzerland, 2004 to 2014. *Euro Surveill* 2016;21(21):pii=30239. doi: <http://dx.doi.org/10.2807/1560-7917.ES.2016.21.21.30239>.
28. Kyaw MH, Lynfield R, Schaffner W, et al. Effect of introduction of the pneumococcal conjugate vaccine on drug-resistant *Streptococcus pneumoniae*. *N Engl J Med* 2006;354(14):1455-63. doi: 10.1056/NEJMoa051642.

- 1  
2  
3 29. Dagan R, Juergens C, Trammel J, et al. Efficacy of 13-valent pneumococcal conjugate vaccine (PCV13)  
4 versus that of 7-valent PCV (PCV7) against nasopharyngeal colonization of antibiotic nonsusceptible  
5 *Streptococcus pneumoniae*. *J Infect Dis* 2015;211(7):1144-53. doi: 10.1093/infdis/jiu576.  
6  
7  
8  
9 30. Meichtry J, Born R, Küffer M, et al. Serotype epidemiology of invasive pneumococcal disease in Swiss  
10 adults: a nationwide population-based study. *Vaccine* 2014;32(40):5185-91. doi:  
11 10.1016/j.vaccine.2014.07.060.  
12  
13  
14 31. European Centre for Disease Prevention and Control. Antimicrobial resistance surveillance in Europe  
15 2015. Annual Report of the European Antimicrobial Resistance Surveillance Network (EARS-Net).  
16 Stockholm: ECDC. 2017. Available from:  
17 <http://ecdc.europa.eu/en/publications/Publications/antimicrobial-resistance-europe-2015.pdf> (Accessed  
18 August 4, 2017).  
19  
20  
21  
22  
23  
24 32. Intesa, ai sensi dell'articolo 8, comma 6, della legge 5 giugno 2003, n. 131, tra il Governo, le regioni e le  
25 province autonome di Trento e Bolzano sul documento recante «Piano nazionale prevenzione vaccinale  
26 2017-2019», GU Serie Generale n. 41 del 18-2-2017. 2017. Italy. Available from:  
27 <http://www.trovanorme.salute.gov.it/norme/dettaglioAtto?id=58185&completo=true> (Accessed August  
28 4, 2017).  
29  
30  
31  
32  
33  
34 33. Webber C, Patton M, Patterson S, et al. Exploratory efficacy endpoints in the Community-Acquired  
35 Pneumonia Immunization Trial in Adults (CAPiTA). *Vaccine* 2017;35(9):1266-1272. doi:  
36 10.1016/j.vaccine.2017.01.032.  
37  
38  
39  
40 34. Mendes RE, Hollingsworth RC, Costello A, et al. Noninvasive *Streptococcus pneumoniae* serotypes  
41 recovered from hospitalized adult patients in the United States in 2009 to 2012. *Antimicrob Agents*  
42 *Chemother* 2015;59:5595-601. doi: 10.1128/AAC.00182-15  
43  
44  
45  
46 35. Torres A, Blasi F, Dartois N, Akova M. Which individuals are at increased risk of pneumococcal disease  
47 and why? Impact of COPD, asthma, smoking, diabetes, and/or chronic heart disease on community-  
48 acquired pneumonia and invasive pneumococcal disease. *Thorax* 2015;70:984-9. doi: 10.1136/thoraxjnl-  
49 2015-206780  
50  
51  
52  
53  
54 36. Joint Committee on Vaccination and Immunisation, Department of Health, UK. Interim JCVI statement  
55 on adult pneumococcal vaccination in the UK - November 2015. 2015. UK. Available from:  
56  
57  
58  
59



1  
2  
3 [https://www.gov.uk/government/uploads/system/uploads/attachment\\_data/file/477966/JCVI\\_pnemococcal.pdf](https://www.gov.uk/government/uploads/system/uploads/attachment_data/file/477966/JCVI_pnemococcal.pdf)  
4  
5 (Accessed August 4, 2017).

- 6  
7 37. Baldo V, Cocchio S, Gallo T, et al. Pneumococcal Conjugated Vaccine Reduces the High Mortality for  
8  
9 Community-Acquired Pneumonia in the Elderly: an Italian Regional Experience. *PLoS ONE* 2016.  
10  
11 11(11):e0166637. doi: 10.1371/journal.pone.016663.
- 12  
13 38. Schiffner-Rohe J, Witt A, Hemmerling J, et al. Efficacy of PPV23 in Preventing Pneumococcal  
14  
15 Pneumonia in Adults at Increased Risk. A Systematic Review and Meta-Analysis. *PLoS One*  
16  
17 2016;11(1):e0146338. doi: 10.1371/journal.pone.0146338.

1  
2  
3  
4 **Figure 1. Seasonal distribution of cases in the CAP cohort (N=186)**  
5

6  
7 **Figure 2. Number of cases of pneumococcal CAP by serotype and vaccination status (N=59)**  
8

9  
10  
11 **Figure 3. PCV13 effectiveness (%) estimates against CAP due to any pneumococcal strain managed in the**  
12 **community\***  
13

14 \* Fourteen cases (66.7%) had CAP caused by one of the PCV7 serotypes, of which 14 and 9V were the most common;  
15 three cases (14.3%) were due to additional PCV13 serotype 19A; three cases (14.3%) had CAP due to other serotypes;  
16 one (4.7%) had nontypeable pneumococcal CAP. One case vaccinated with PCV13 was caused by serotype 12F.  
17  
18  
19  
20  
21  
22  
23  
24  
25  
26  
27  
28  
29  
30  
31  
32  
33  
34  
35  
36  
37  
38  
39  
40  
41  
42  
43  
44  
45  
46  
47  
48  
49  
50  
51  
52  
53  
54  
55  
56  
57  
58  
59  
60

1  
2  
3  
4  
5  
6  
7  
8  
9  
10  
11  
12  
13  
14  
15  
16  
17  
18  
19  
20  
21  
22  
23  
24  
25  
26  
27  
28  
29  
30  
31  
32  
33  
34  
35  
36  
37  
38  
39  
40  
41  
42  
43  
44  
45  
46  
47  
48  
49  
50  
51  
52  
53  
54  
55  
56  
57  
58  
59  
60

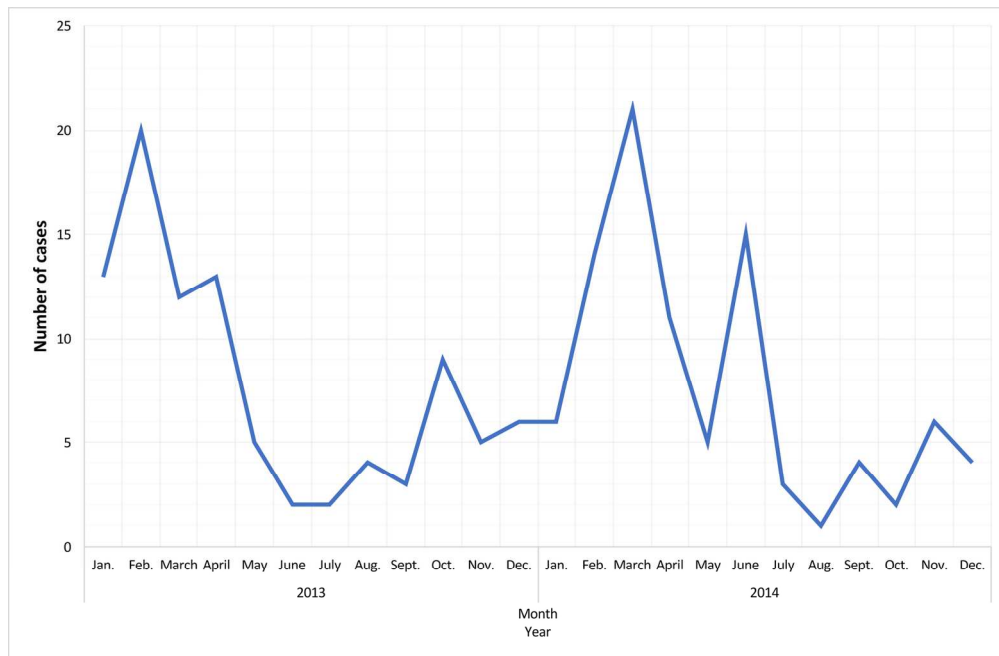

Figure 1. Seasonal distribution of cases in the CAP cohort (N=186)

169x110mm (300 x 300 DPI)

view only

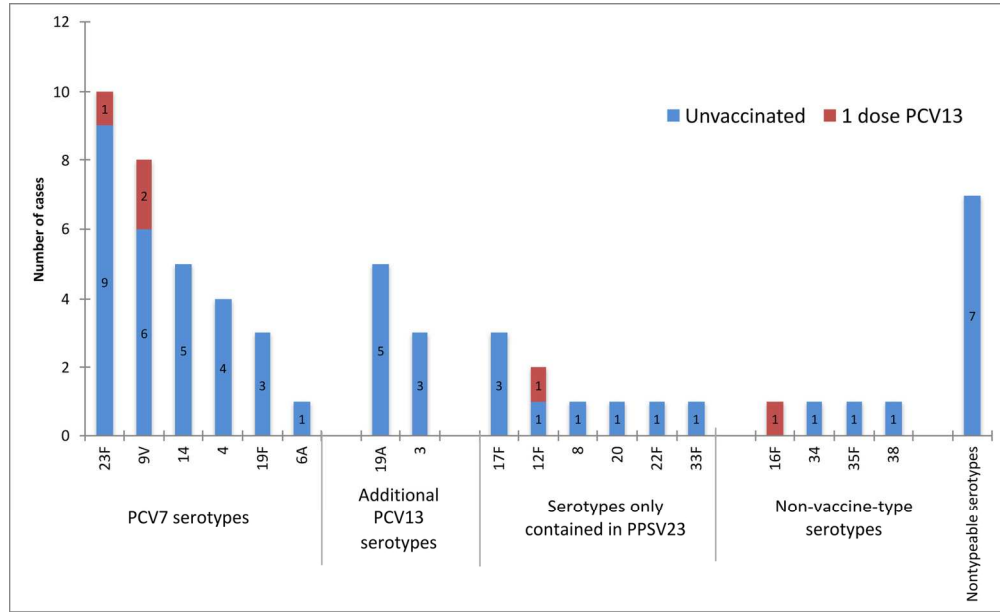

Figure 2. Number of cases of pneumococcal CAP by serotype and vaccination status (N=59)

156x95mm (300 x 300 DPI)

Review only



Figure 3. PCV13 effectiveness (%) estimates against CAP due to any pneumococcal strain managed in the community\*

\* Fourteen cases (66.7%) had CAP caused by one of the PCV7 serotypes, of which 14 and 9V were the most common; three cases (14.3%) were due to additional PCV13 serotype 19A; three cases (14.3%) had CAP due to other serotypes; one (4.7%) had nontypeable pneumococcal CAP. One case vaccinated with PCV13 was caused by serotype 12F.

156x95mm (300 x 300 DPI)

**STROBE 2007 (v4) Statement—Checklist of items that should be included in reports of *cohort studies***

| Section/Topic            | Item # | Recommendation                                                                                                                                                                       | Reported on page # |
|--------------------------|--------|--------------------------------------------------------------------------------------------------------------------------------------------------------------------------------------|--------------------|
| Title and abstract       | 1      | (a) Indicate the study's design with a commonly used term in the title or the abstract                                                                                               | 1                  |
|                          |        | (b) Provide in the abstract an informative and balanced summary of what was done and what was found                                                                                  | 2                  |
| <b>Introduction</b>      |        |                                                                                                                                                                                      |                    |
| Background/rationale     | 2      | Explain the scientific background and rationale for the investigation being reported                                                                                                 | 4-5                |
| Objectives               | 3      | State specific objectives, including any prespecified hypotheses                                                                                                                     | 5                  |
| <b>Methods</b>           |        |                                                                                                                                                                                      |                    |
| Study design             | 4      | Present key elements of study design early in the paper                                                                                                                              | 6                  |
| Setting                  | 5      | Describe the setting, locations, and relevant dates, including periods of recruitment, exposure, follow-up, and data collection                                                      | 6                  |
| Participants             | 6      | (a) Give the eligibility criteria, and the sources and methods of selection of participants. Describe methods of follow-up                                                           | 6                  |
|                          |        | (b) For matched studies, give matching criteria and number of exposed and unexposed                                                                                                  | 8                  |
| Variables                | 7      | Clearly define all outcomes, exposures, predictors, potential confounders, and effect modifiers. Give diagnostic criteria, if applicable                                             | 6-8                |
| Data sources/measurement | 8*     | For each variable of interest, give sources of data and details of methods of assessment (measurement). Describe comparability of assessment methods if there is more than one group | 6-8                |
| Bias                     | 9      | Describe any efforts to address potential sources of bias                                                                                                                            | 8-9                |
| Study size               | 10     | Explain how the study size was arrived at                                                                                                                                            | 8-9                |
| Quantitative variables   | 11     | Explain how quantitative variables were handled in the analyses. If applicable, describe which groupings were chosen and why                                                         | 8-9                |
| Statistical methods      | 12     | (a) Describe all statistical methods, including those used to control for confounding                                                                                                | 8-9                |
|                          |        | (b) Describe any methods used to examine subgroups and interactions                                                                                                                  | 8-9                |
|                          |        | (c) Explain how missing data were addressed                                                                                                                                          | 8-9                |
|                          |        | (d) If applicable, explain how loss to follow-up was addressed                                                                                                                       | 8-9                |
|                          |        | (e) Describe any sensitivity analyses                                                                                                                                                | -                  |
| <b>Results</b>           |        |                                                                                                                                                                                      |                    |

|                          |     |                                                                                                                                                                                                              |       |
|--------------------------|-----|--------------------------------------------------------------------------------------------------------------------------------------------------------------------------------------------------------------|-------|
| Participants             | 13* | (a) Report numbers of individuals at each stage of study—eg numbers potentially eligible, examined for eligibility, confirmed eligible, included in the study, completing follow-up, and analysed            | 9     |
|                          |     | (b) Give reasons for non-participation at each stage                                                                                                                                                         | 9     |
|                          |     | (c) Consider use of a flow diagram                                                                                                                                                                           | -     |
| Descriptive data         | 14* | (a) Give characteristics of study participants (eg demographic, clinical, social) and information on exposures and potential confounders                                                                     | 9     |
|                          |     | (b) Indicate number of participants with missing data for each variable of interest                                                                                                                          | 9     |
|                          |     | (c) Summarise follow-up time (eg, average and total amount)                                                                                                                                                  | -     |
| Outcome data             | 15* | Report numbers of outcome events or summary measures over time                                                                                                                                               | 9     |
| Main results             | 16  | (a) Give unadjusted estimates and, if applicable, confounder-adjusted estimates and their precision (eg, 95% confidence interval). Make clear which confounders were adjusted for and why they were included | 10-11 |
|                          |     | (b) Report category boundaries when continuous variables were categorized                                                                                                                                    | 9     |
|                          |     | (c) If relevant, consider translating estimates of relative risk into absolute risk for a meaningful time period                                                                                             | -     |
| Other analyses           | 17  | Report other analyses done—eg analyses of subgroups and interactions, and sensitivity analyses                                                                                                               | 11    |
| <b>Discussion</b>        |     |                                                                                                                                                                                                              |       |
| Key results              | 18  | Summarise key results with reference to study objectives                                                                                                                                                     | 12-14 |
| <b>Limitations</b>       |     |                                                                                                                                                                                                              |       |
| Interpretation           | 20  | Give a cautious overall interpretation of results considering objectives, limitations, multiplicity of analyses, results from similar studies, and other relevant evidence                                   | 14    |
| Generalisability         | 21  | Discuss the generalisability (external validity) of the study results                                                                                                                                        | 15    |
| <b>Other information</b> |     |                                                                                                                                                                                                              |       |
| Funding                  | 22  | Give the source of funding and the role of the funders for the present study and, if applicable, for the original study on which the present article is based                                                | 16    |

\*Give information separately for cases and controls in case-control studies and, if applicable, for exposed and unexposed groups in cohort and cross-sectional studies.

**Note:** An Explanation and Elaboration article discusses each checklist item and gives methodological background and published examples of transparent reporting. The STROBE checklist is best used in conjunction with this article (freely available on the Web sites of PLoS Medicine at <http://www.plosmedicine.org/>, Annals of Internal Medicine at <http://www.annals.org/>, and Epidemiology at <http://www.epidem.com/>). Information on the STROBE Initiative is available at [www.strobe-statement.org](http://www.strobe-statement.org).
